# Supplementary material for: C-Glycosylated cinnamoylfuran derivatives as novel anti-cancer agents
Source: Royal Society of Chemistry journal article supplement (doi:10.1039/c7ra04207h), 2017-01-01
Supplement: c7ra04207h1.pdf [file c7ra04207h1.pdf]

## Supporting information

### **C-Glycosylated cinnamoylfuran derivatives as novel anti-cancer agents**

Ananya Datta,<sup>‡a</sup> Debashis Dhara,<sup>‡a</sup> Pravat Kumar Parida,<sup>a</sup> Anshupriya Si,<sup>a</sup> Ravichandran Yesuvadian,<sup>b</sup> Kuladip Jana,<sup>a\*</sup> and Anup Kumar Misra<sup>a\*</sup>

<sup>a</sup>Bose Institute, Division of Molecular Medicine, P-1/12, C.I.T. Scheme VII M, Kolkata 700054, India.

<sup>b</sup>Department of Biotechnology, School of Bioengineering, SRM University, Kattankulathur – 603203, Tamil Nadu, India.

### **Index**

| <b>Subject</b>                                   | <b>Page No.</b> |
|--------------------------------------------------|-----------------|
| NMR spectra of synthesized compounds <b>7-34</b> | 2-29            |

**NMR spectra of synthesized compounds:**

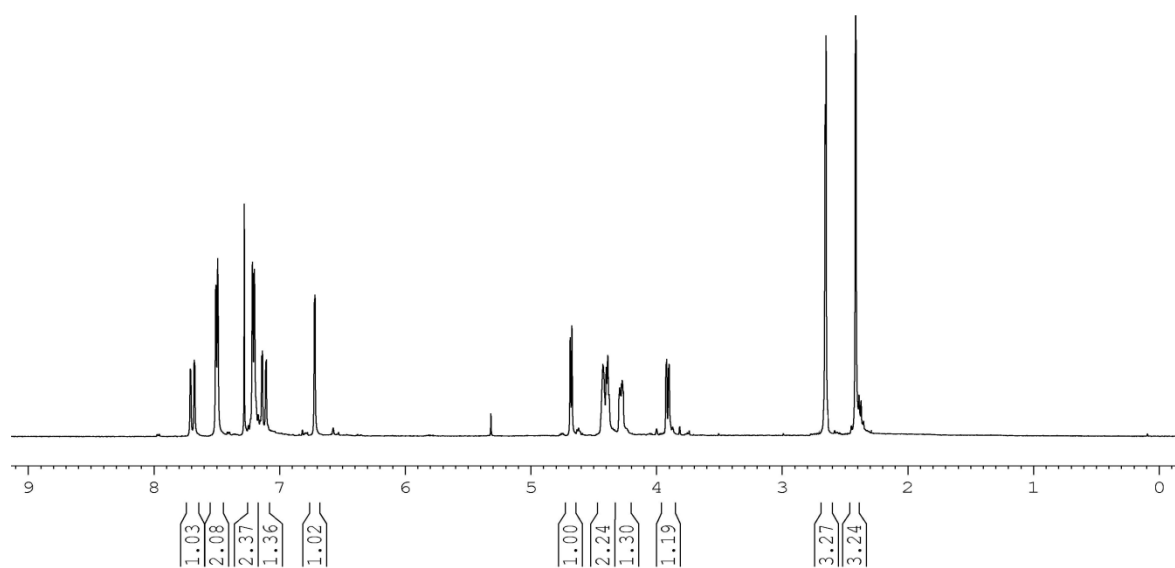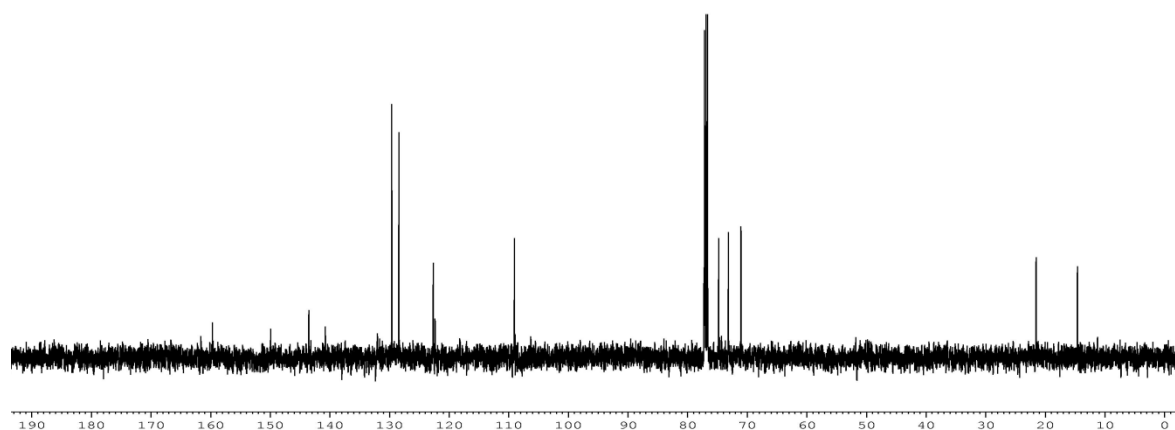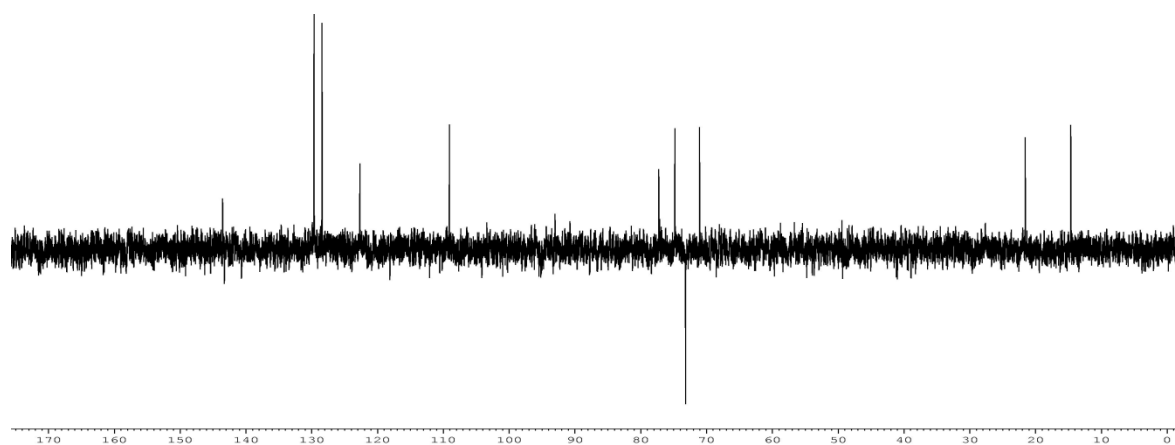

$^1\text{H}$ ,  $^{13}\text{C}$  and DEPT-135 NMR spectra of compound 7.

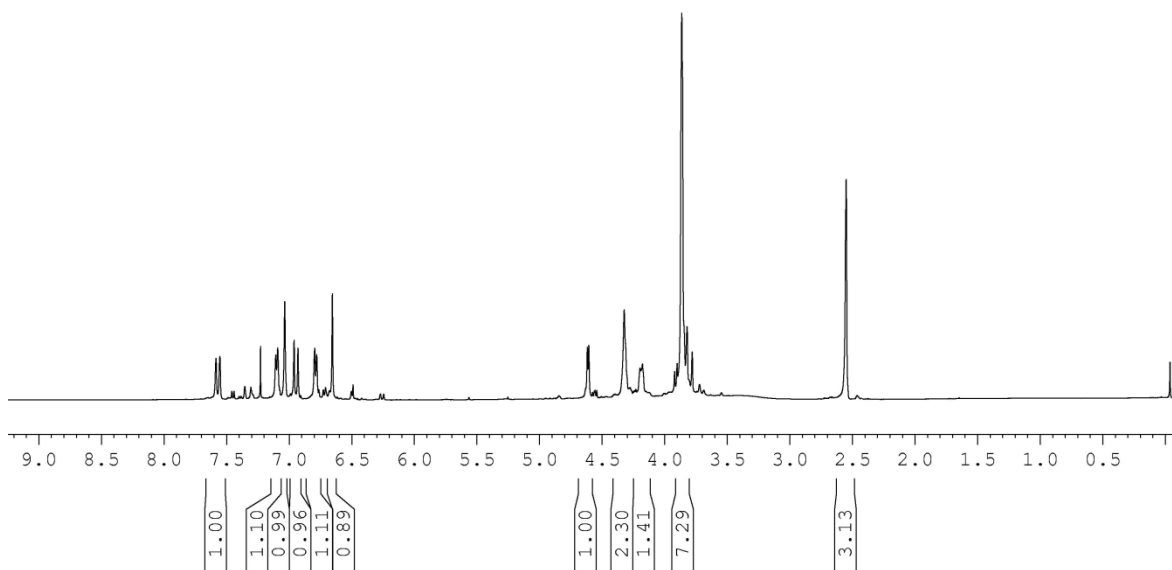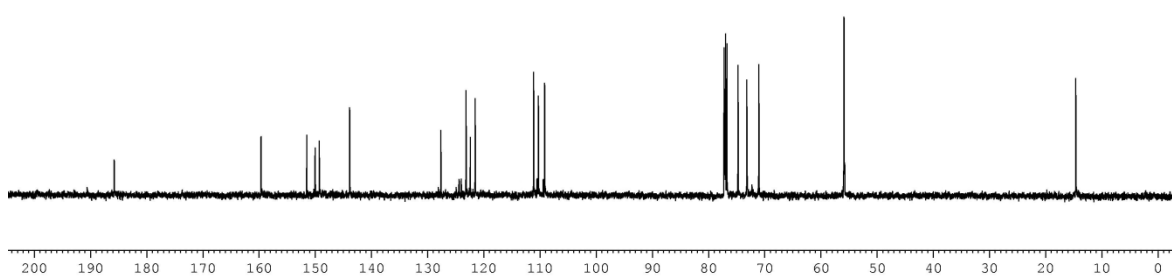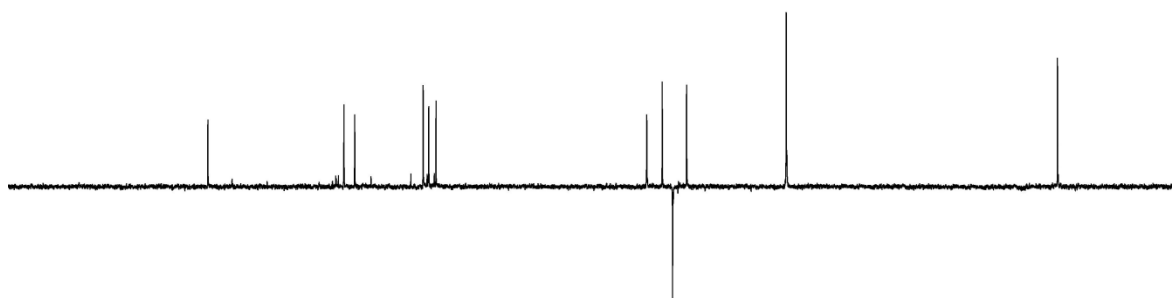

$^1\text{H}$ ,  $^{13}\text{C}$  and DEPT 135 NMR spectra of compound **8**.

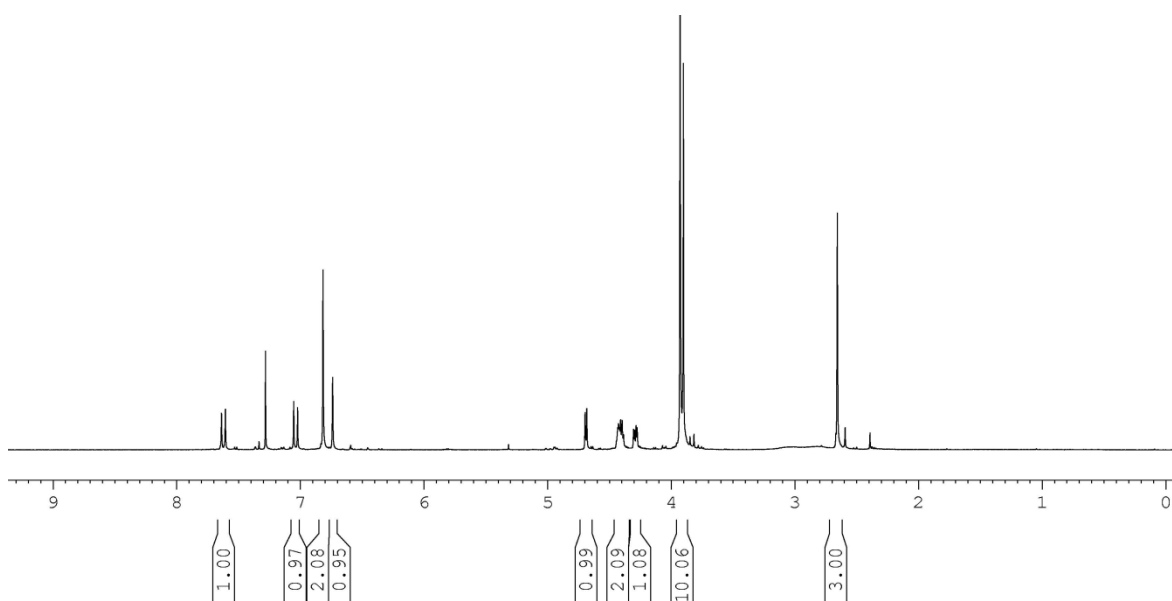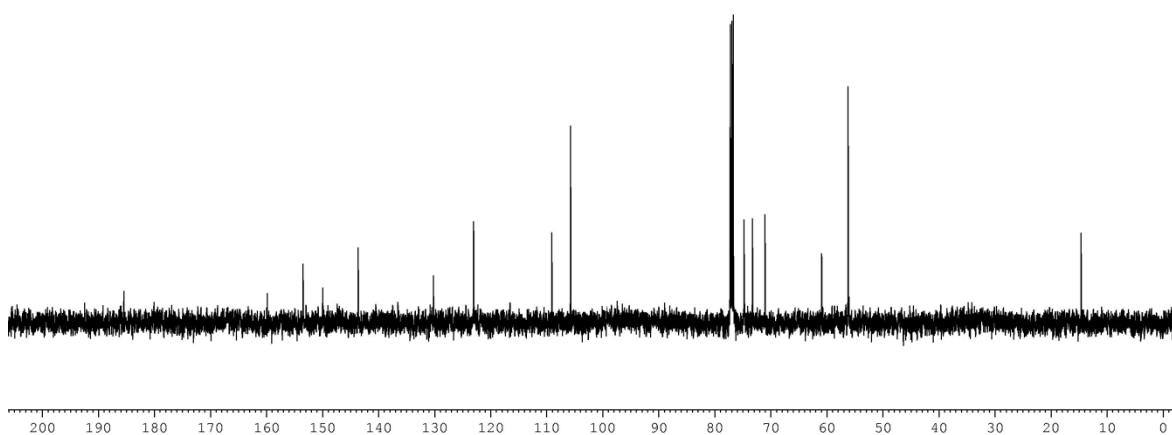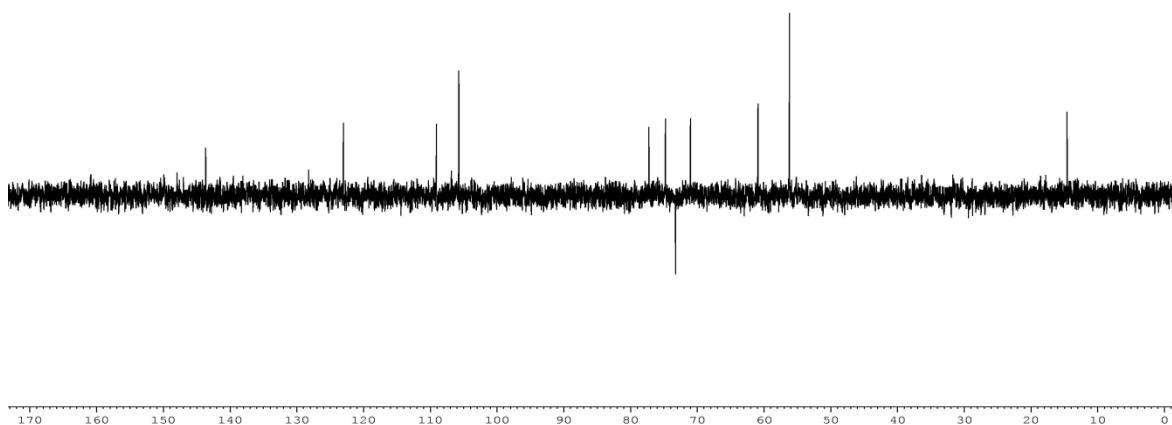

$^1\text{H}$ ,  $^{13}\text{C}$  and DEPT 135 NMR spectra of compound **9**.

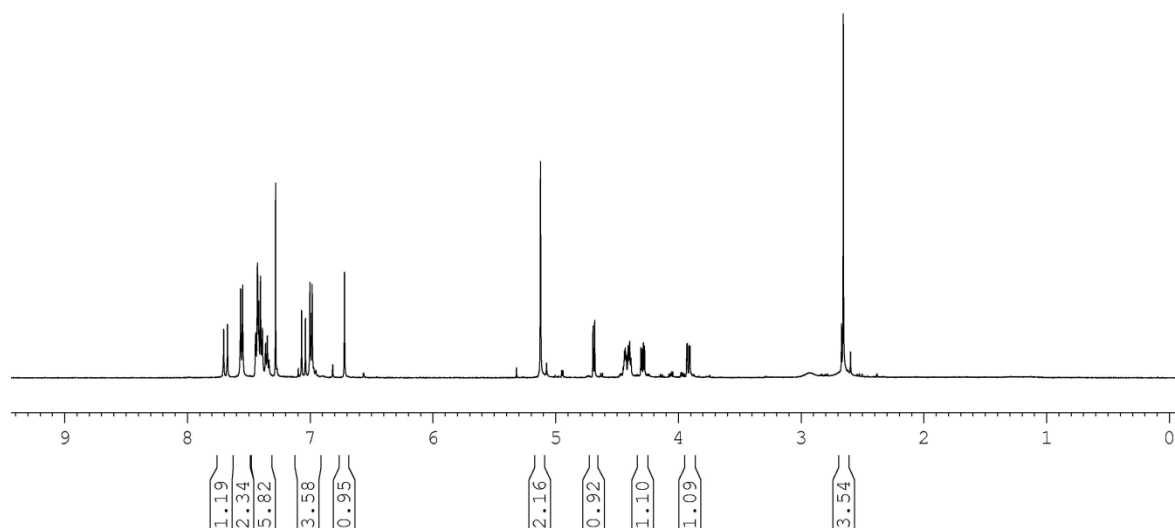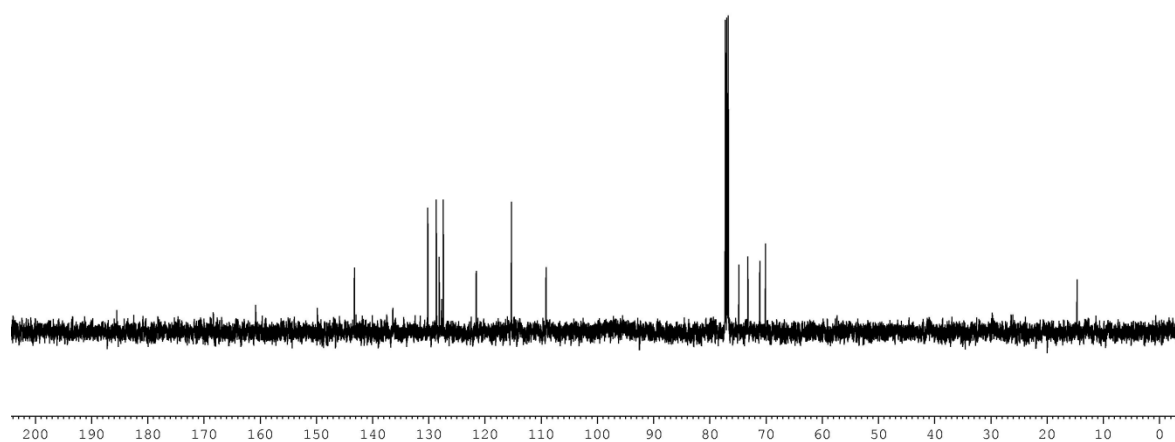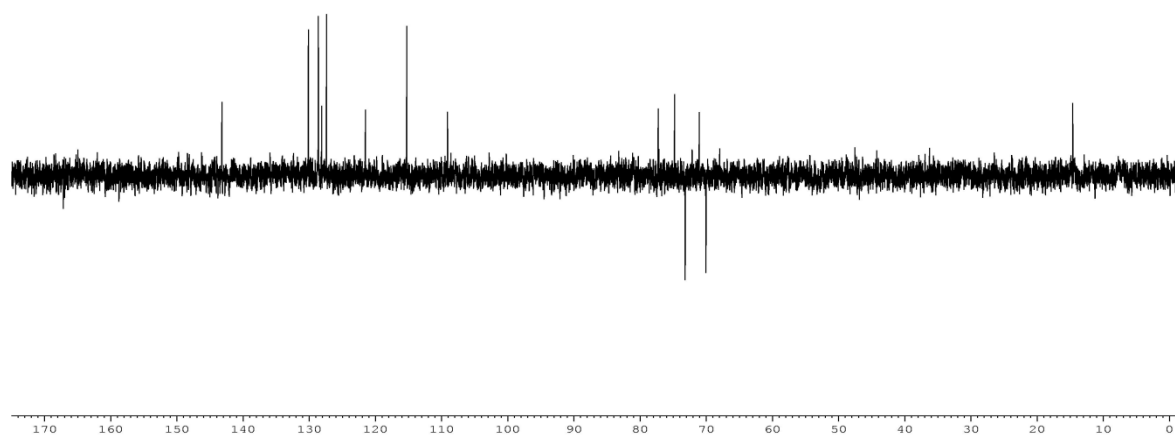

$^1\text{H}$ ,  $^{13}\text{C}$  and DEPT 135 NMR spectra of compound **10**.

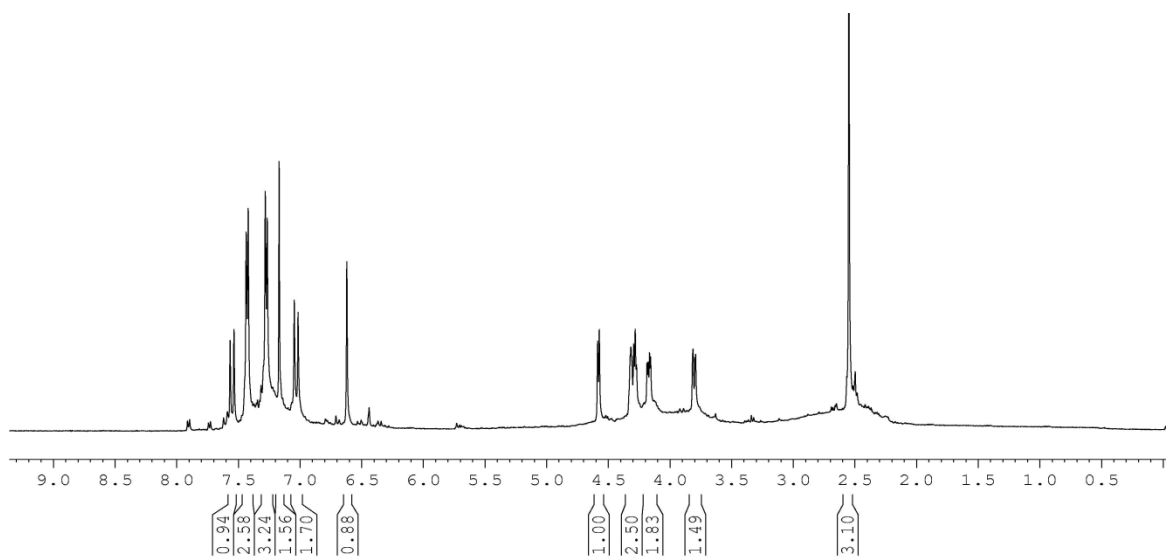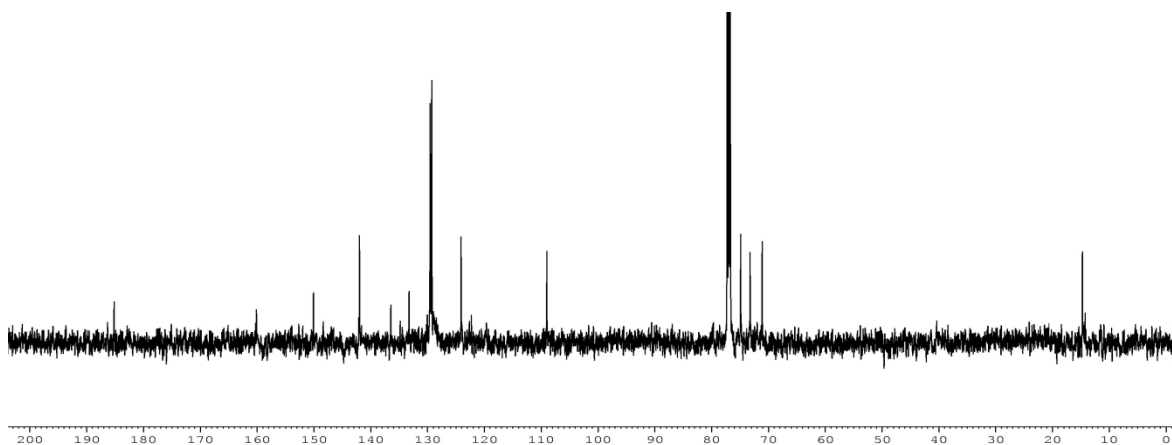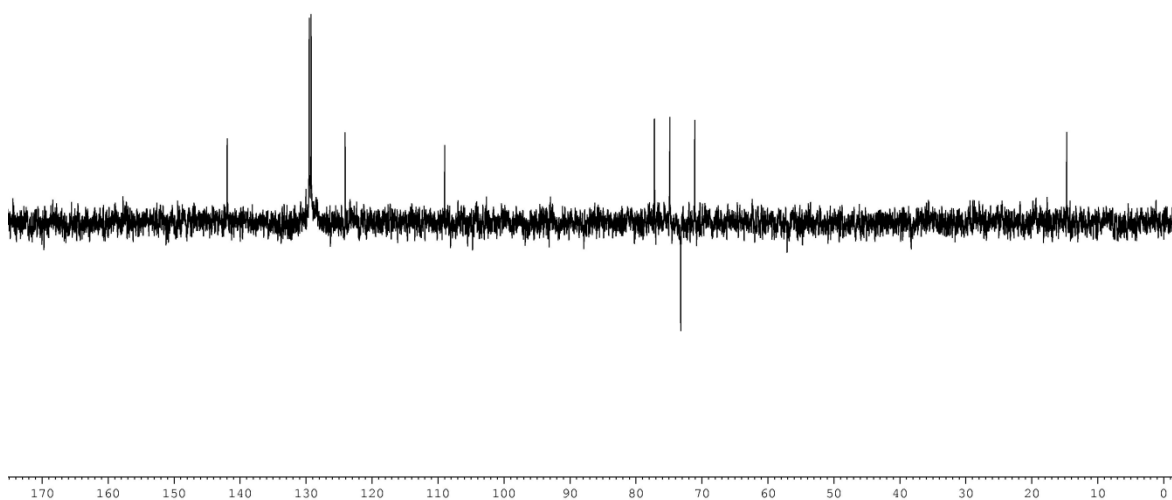

$^1\text{H}$ ,  $^{13}\text{C}$  and DEPT 135 NMR spectra of compound **11**.

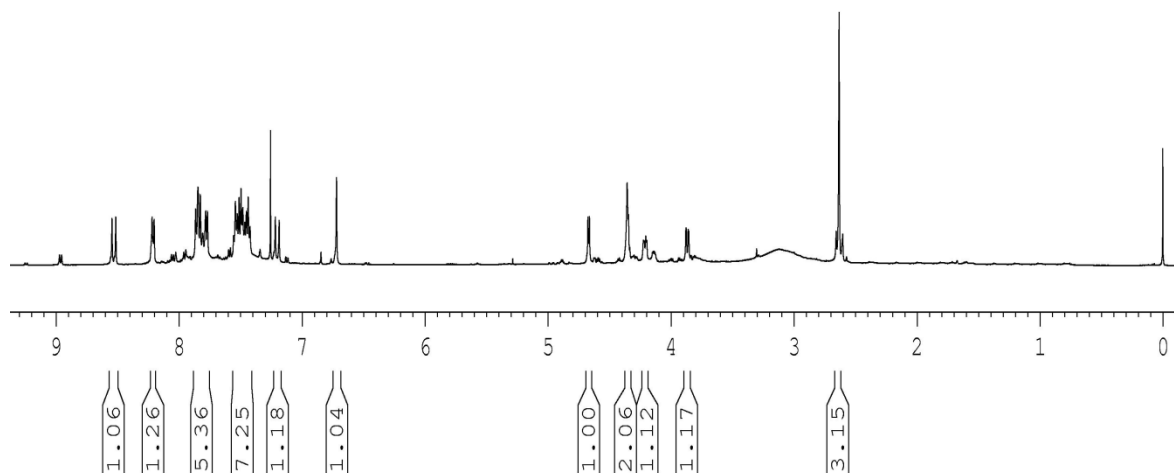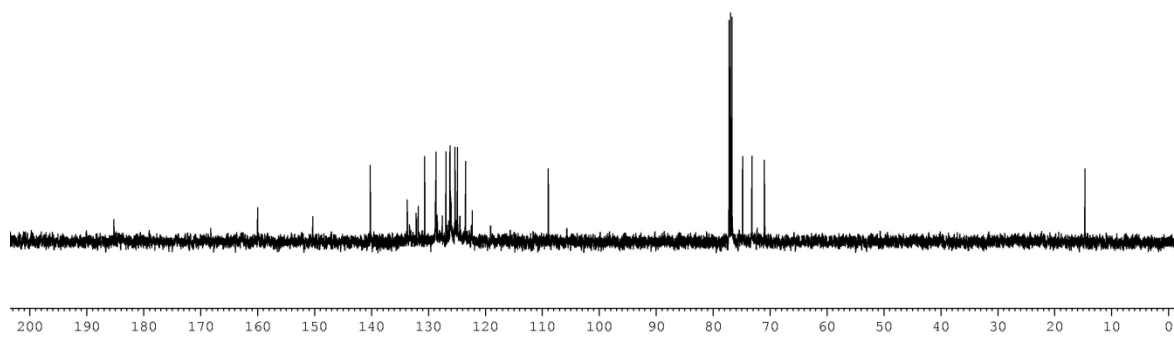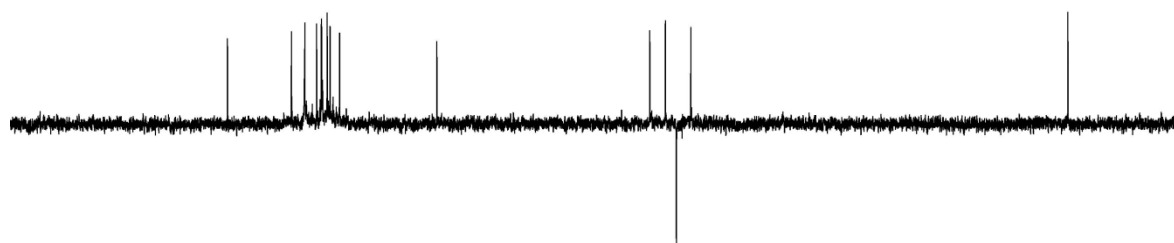

$^1\text{H}$ ,  $^{13}\text{C}$  and DEPT 135 NMR spectra of compound **12**.

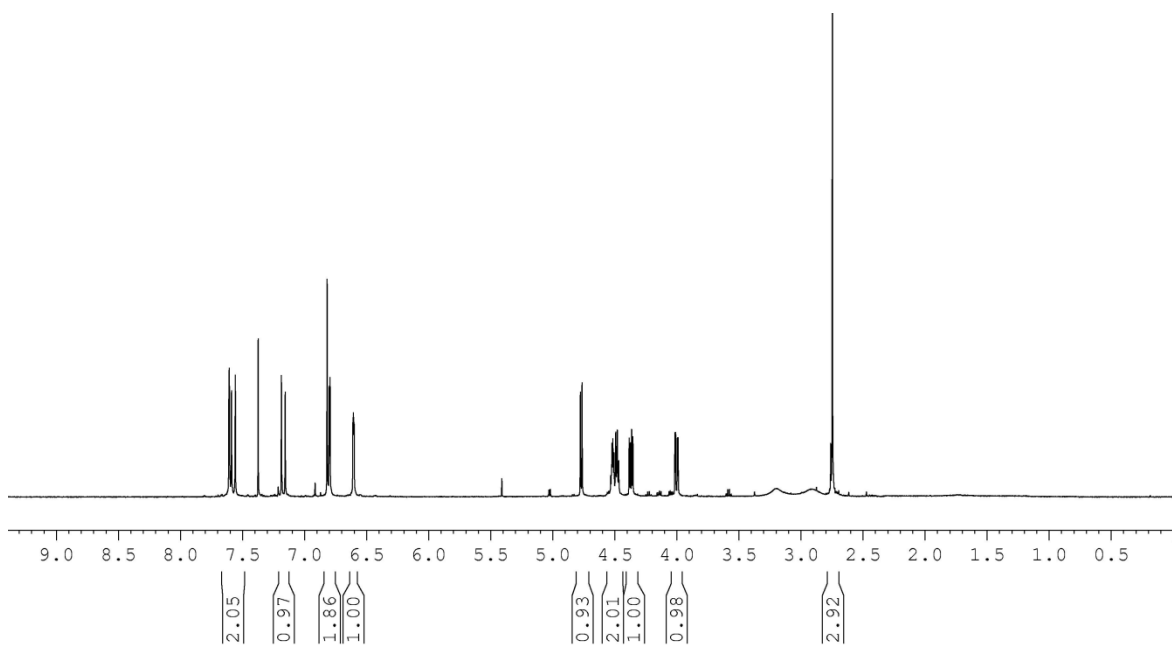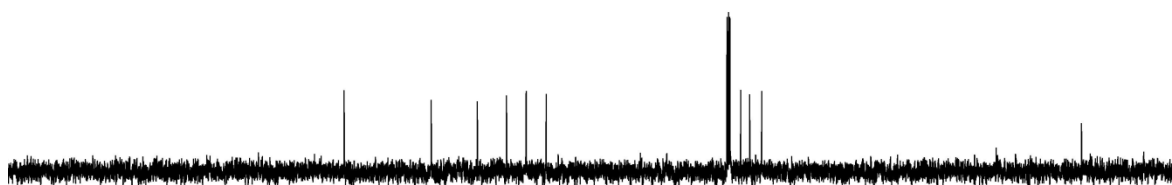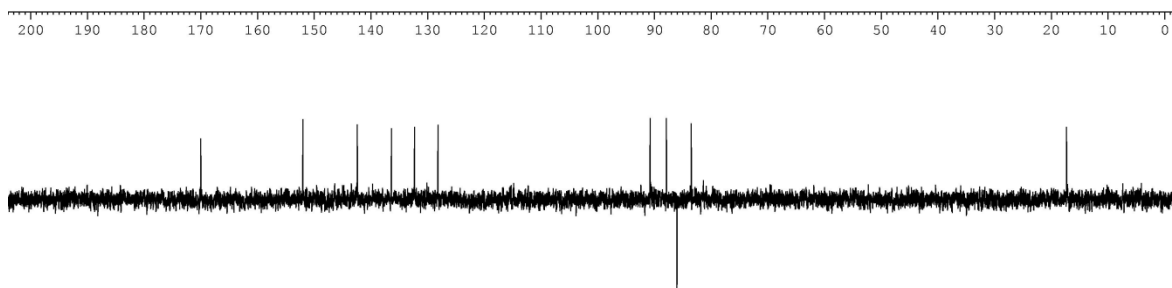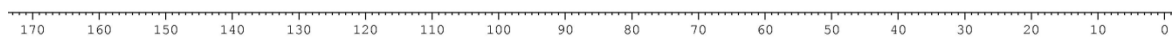

$^1\text{H}$ ,  $^{13}\text{C}$  and DEPT 135 NMR spectra of compound **13**.



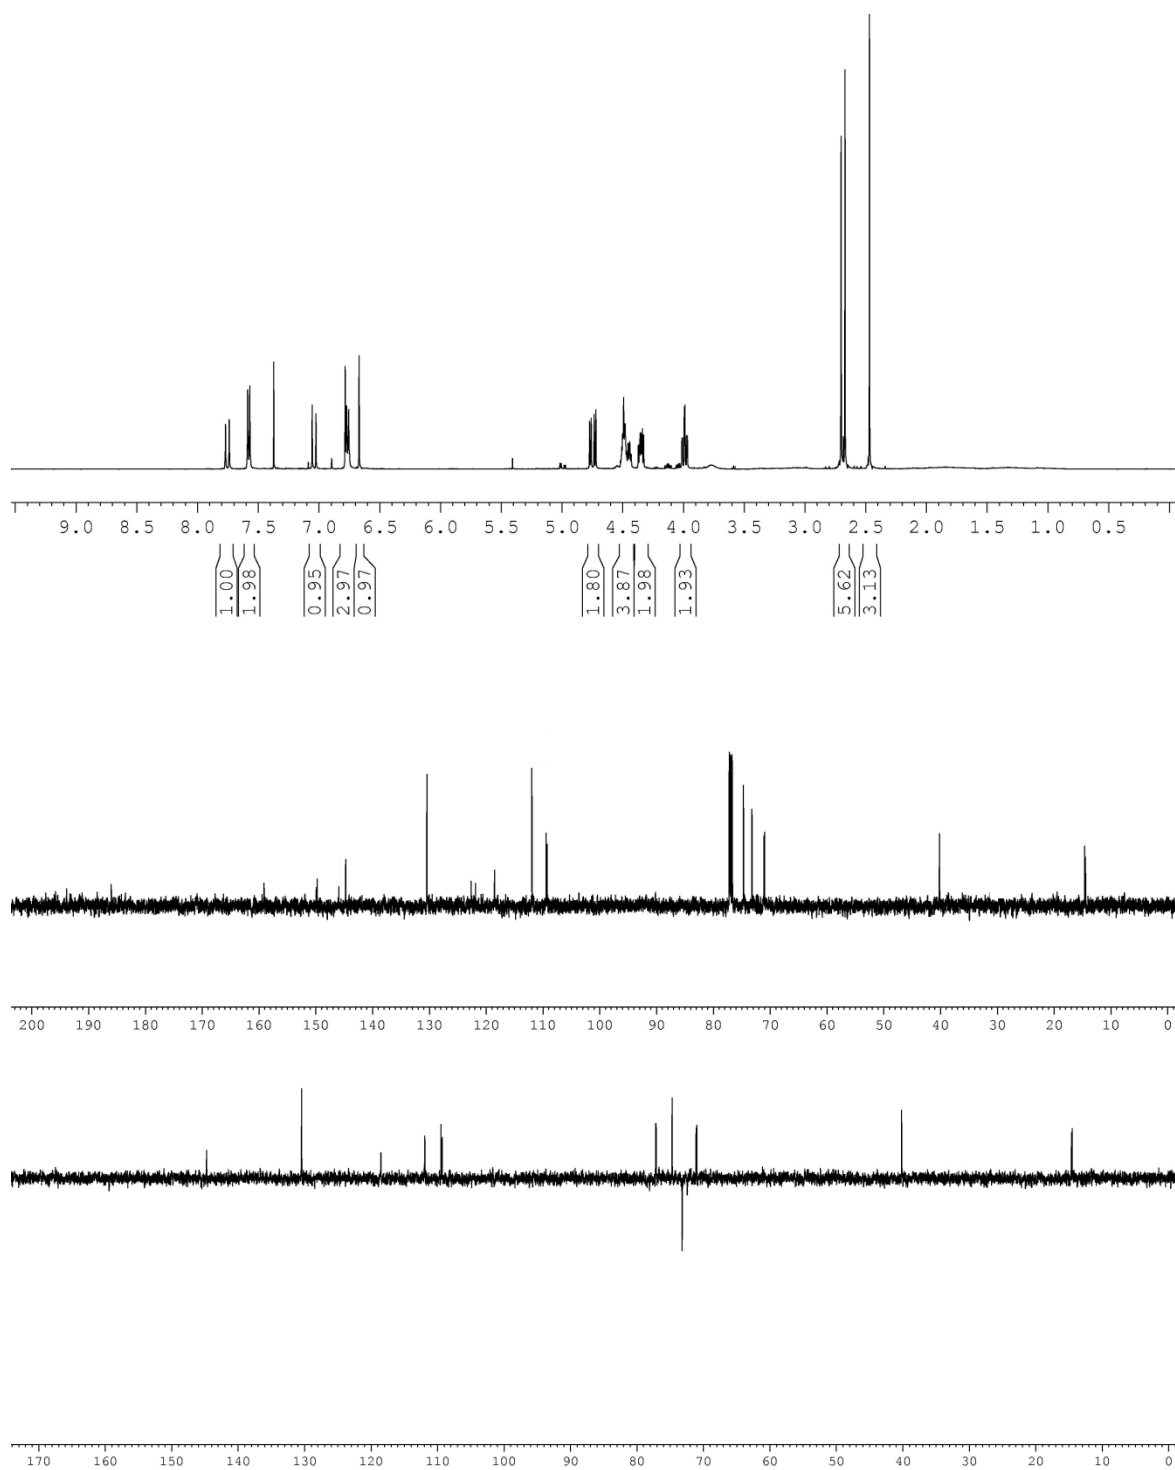

$^1\text{H}$ ,  $^{13}\text{C}$  and DEPT 135 NMR spectra of compound **14**.

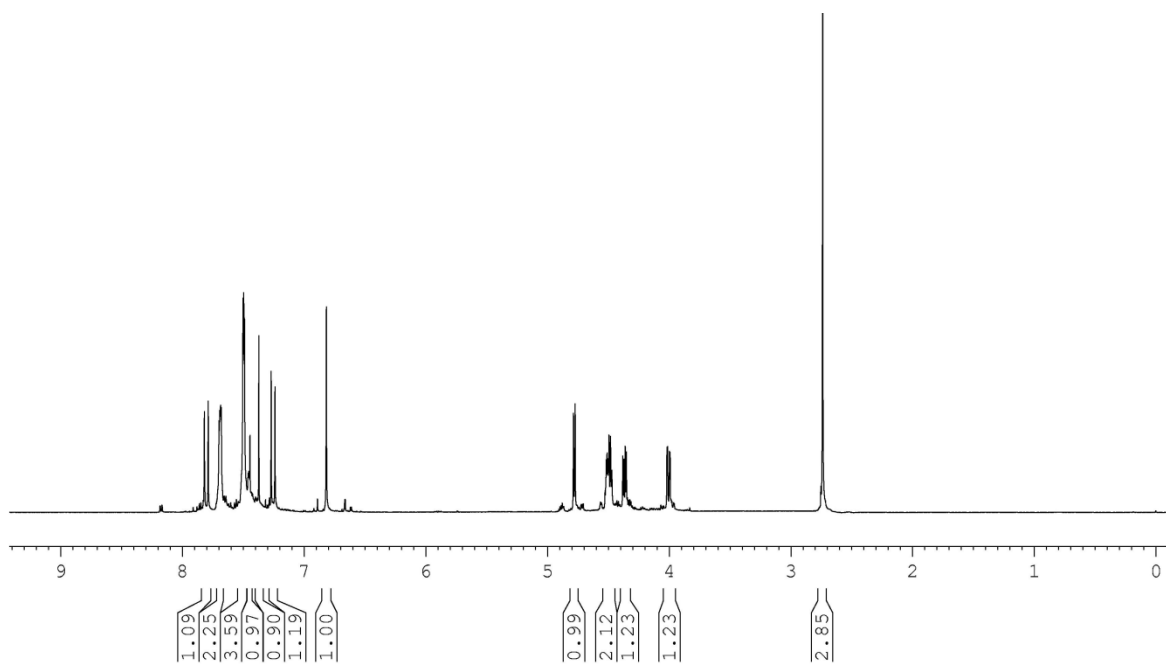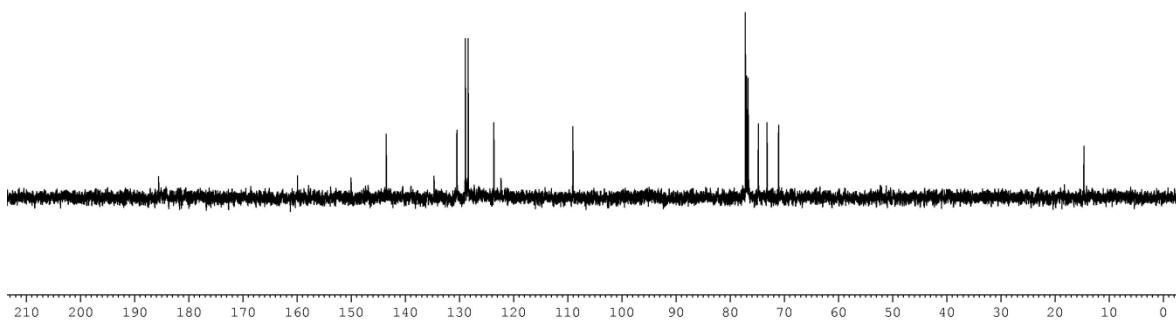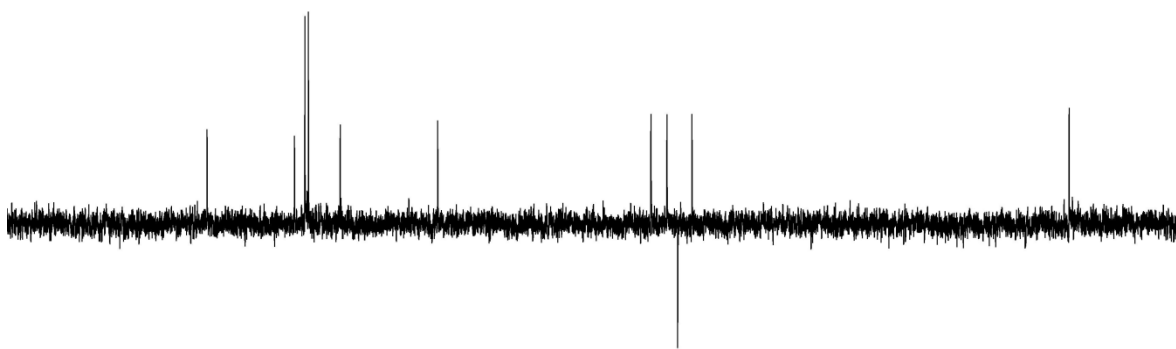

$^1\text{H}$ ,  $^{13}\text{C}$  and DEPT 135 NMR spectra of compound **15**.

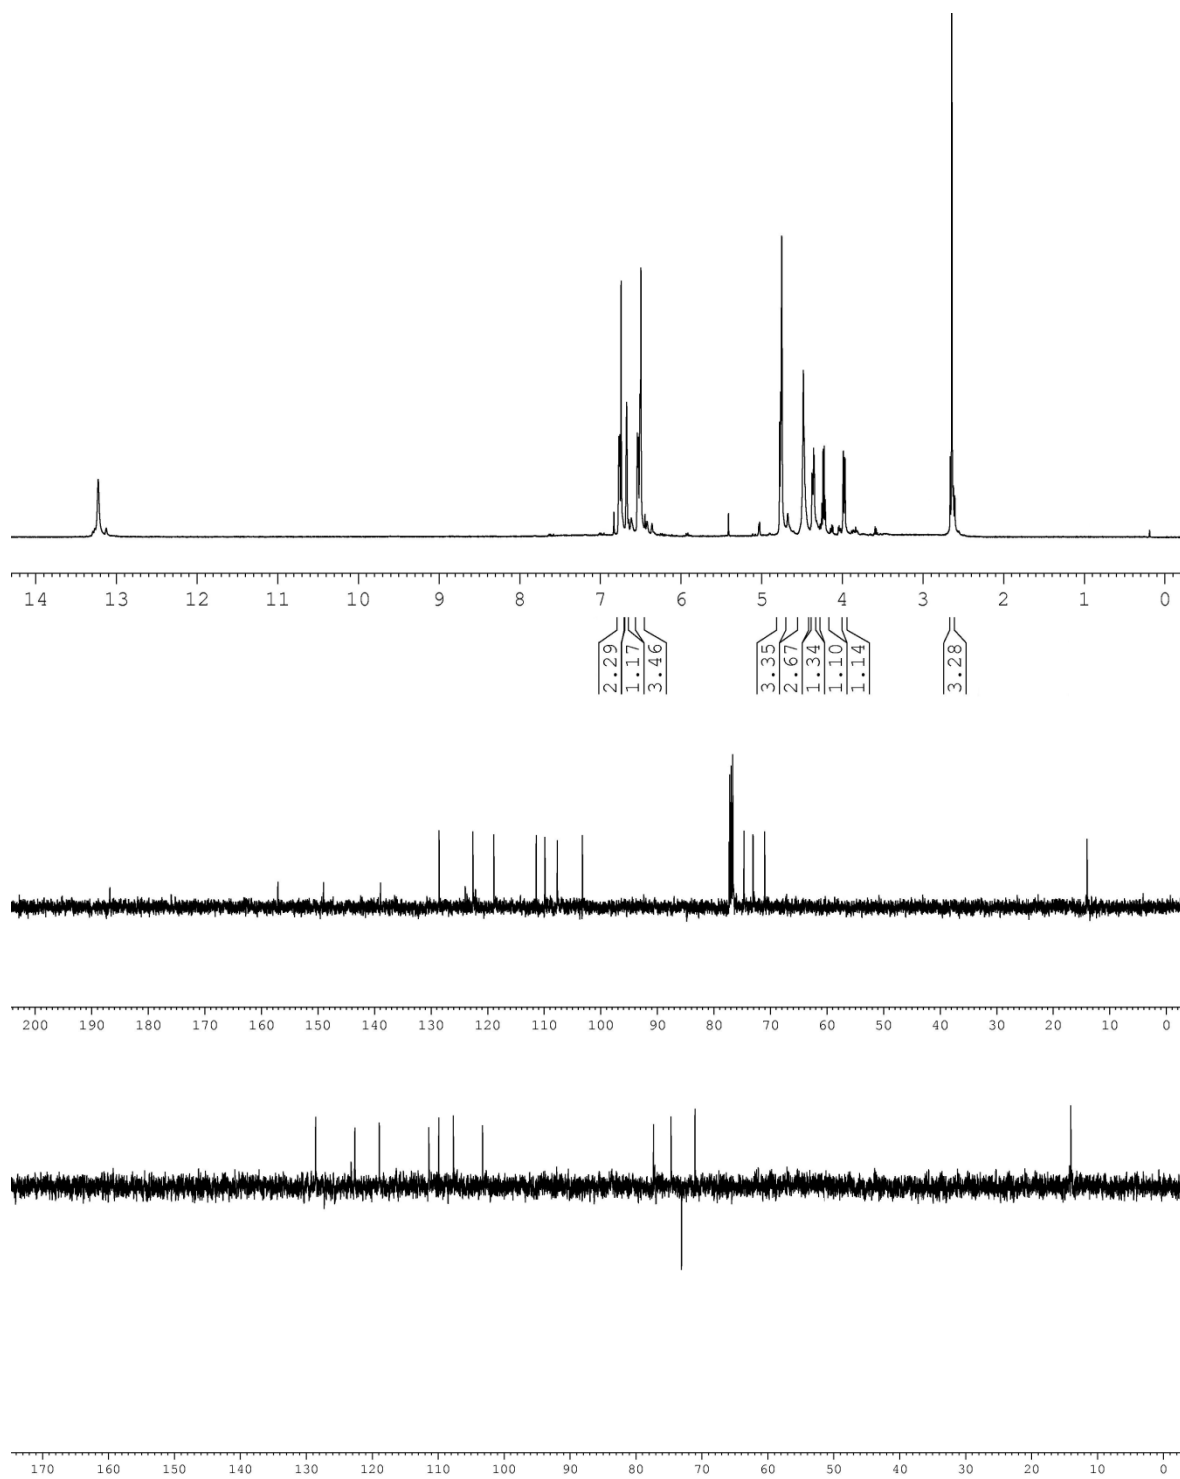

$^1\text{H}$ ,  $^{13}\text{C}$  and DEPT 135 NMR spectra of compound 16.

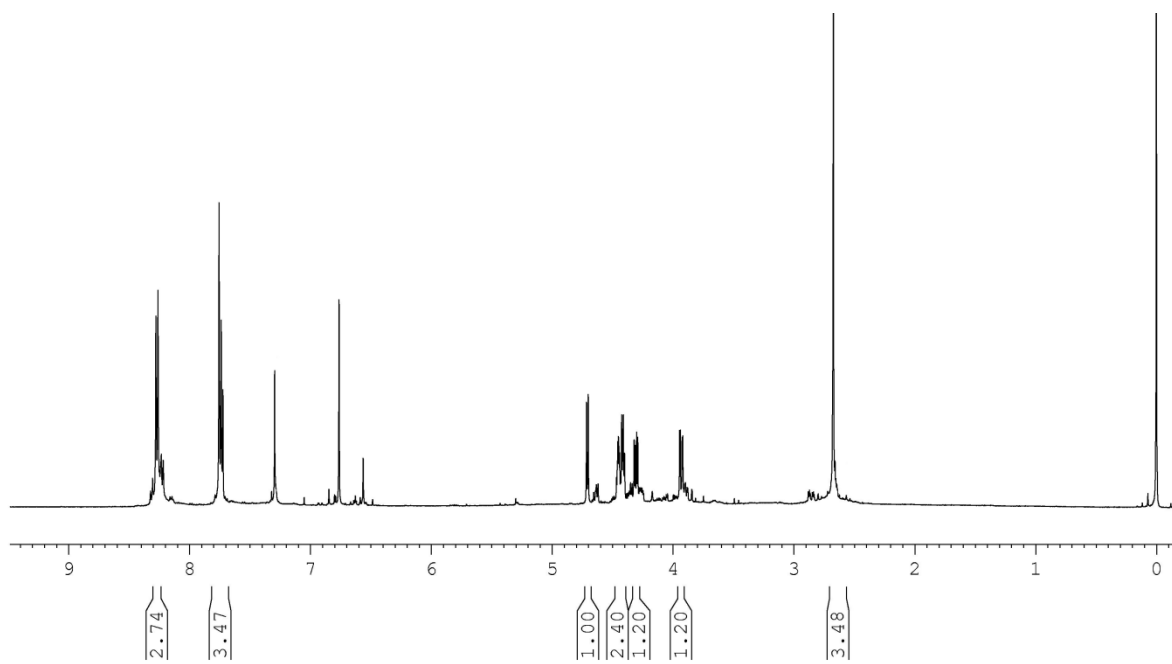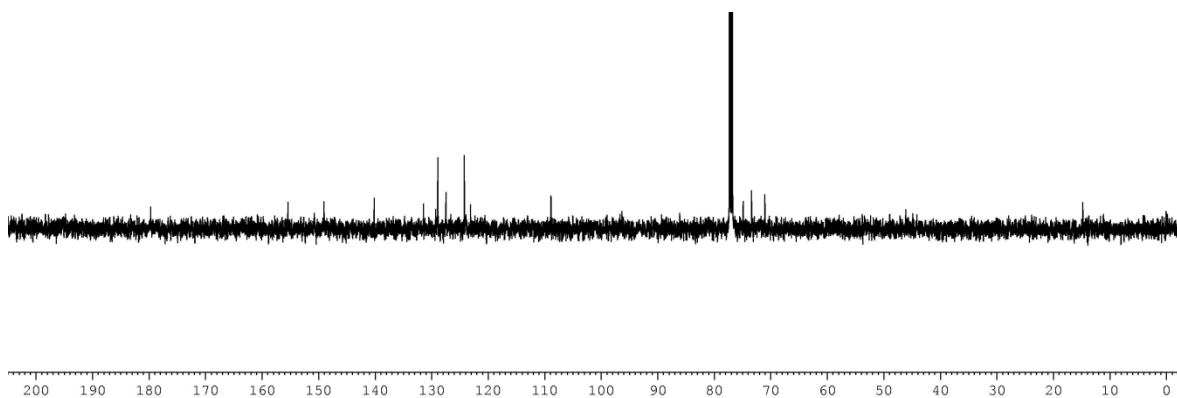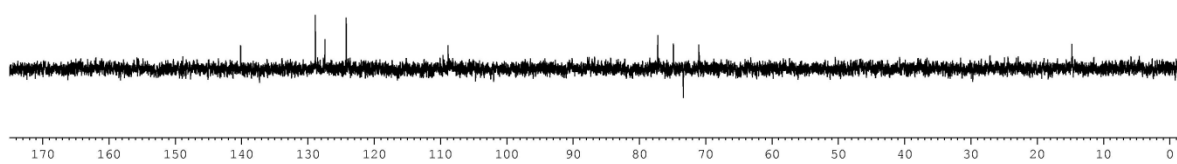

$^1\text{H}$ ,  $^{13}\text{C}$  and DEPT 135 NMR spectra of compound **17**.

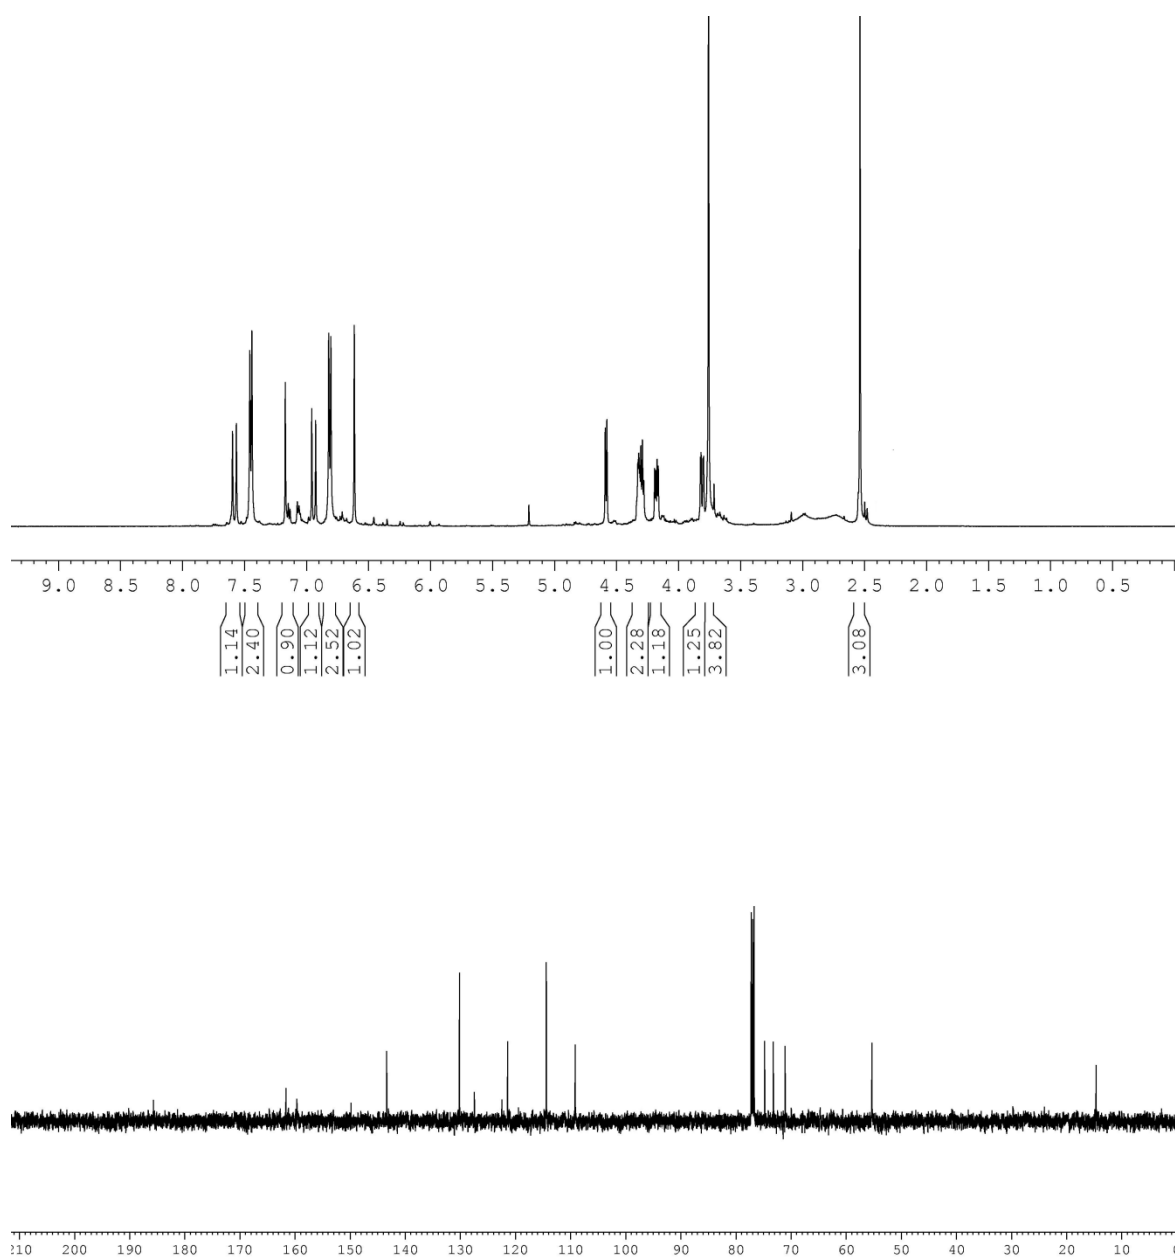

$^1\text{H}$  and  $^{13}\text{C}$  NMR spectra of compound **18**.

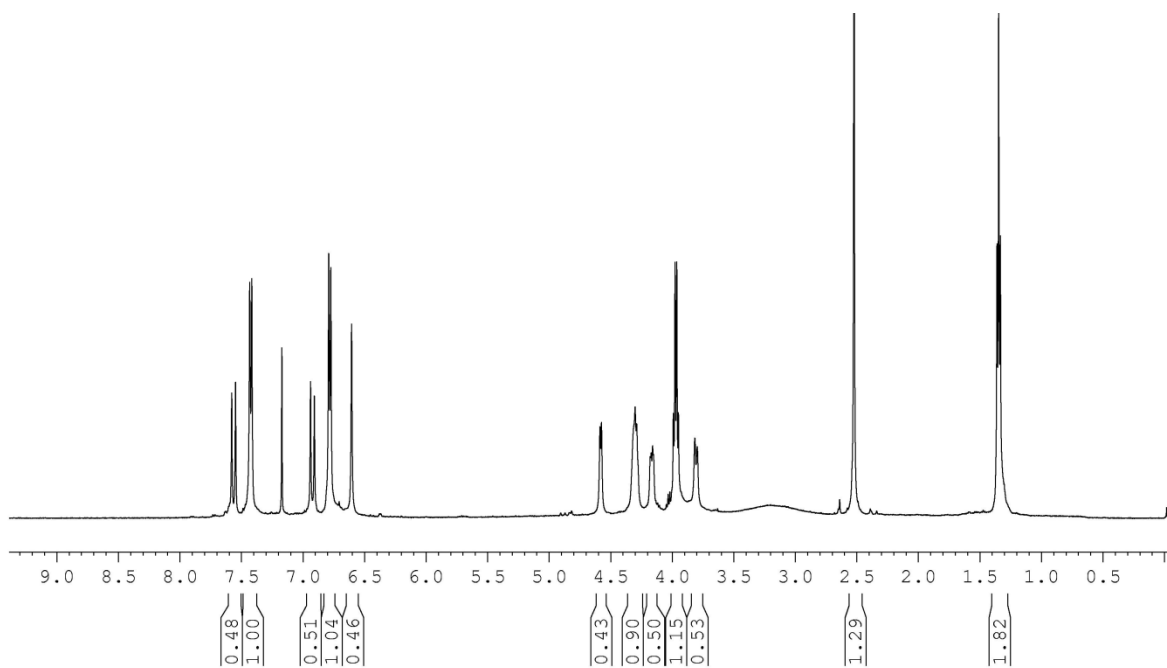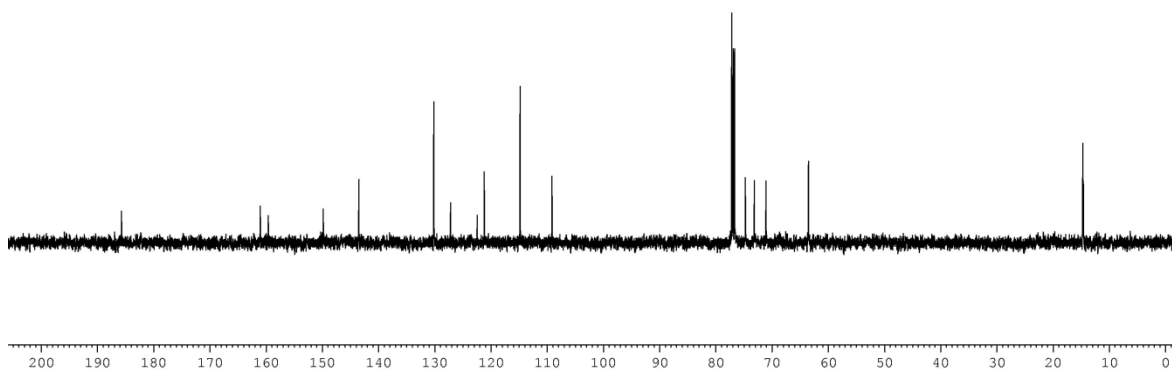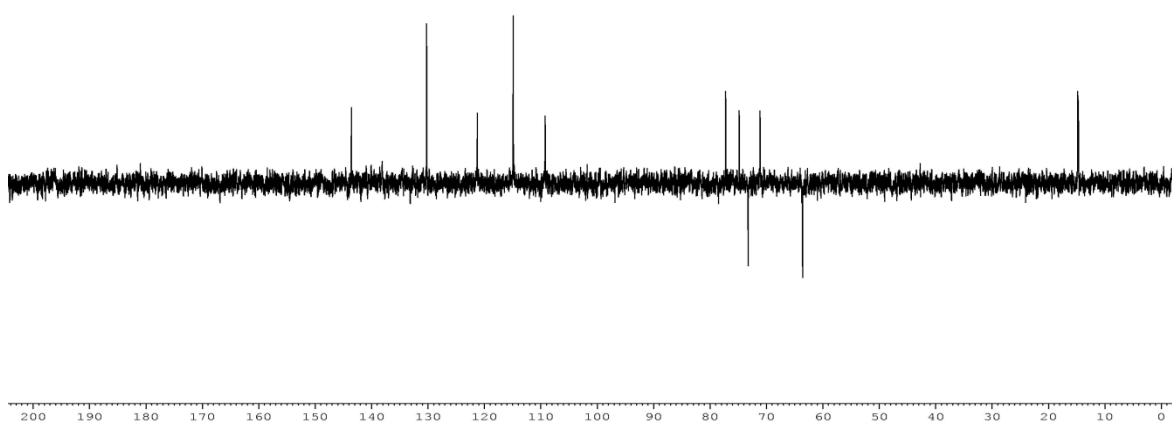

$^1\text{H}$ ,  $^{13}\text{C}$  and DEPT 135 NMR spectra of compound **19**.

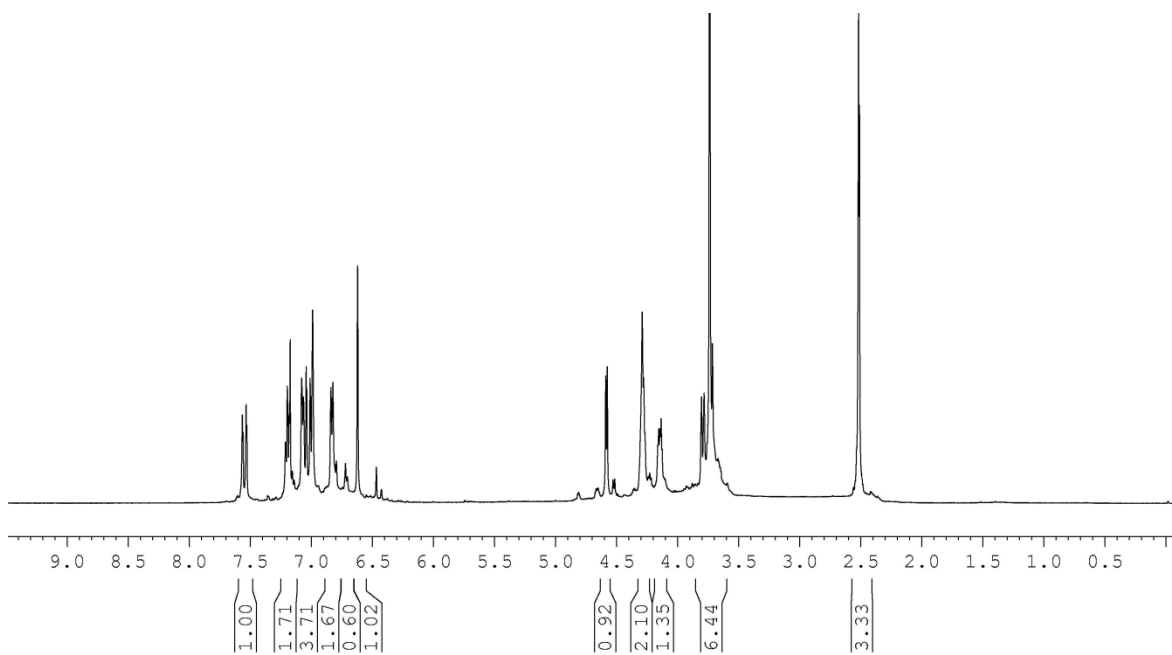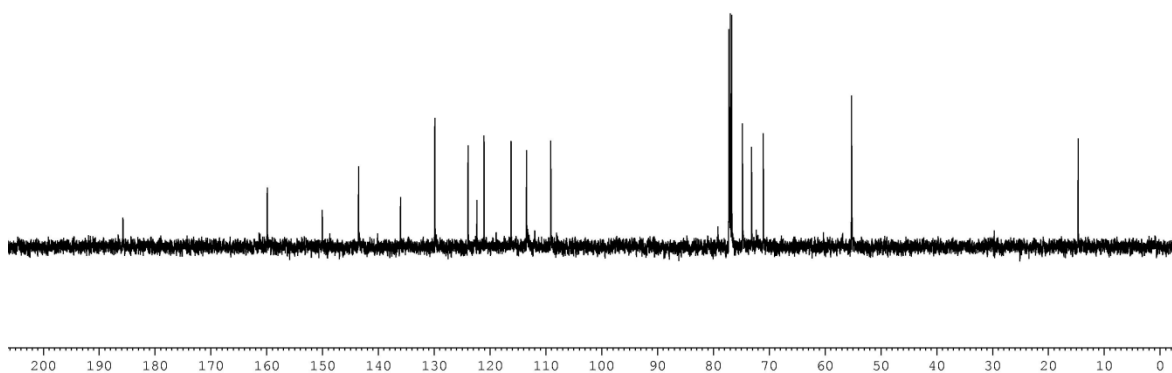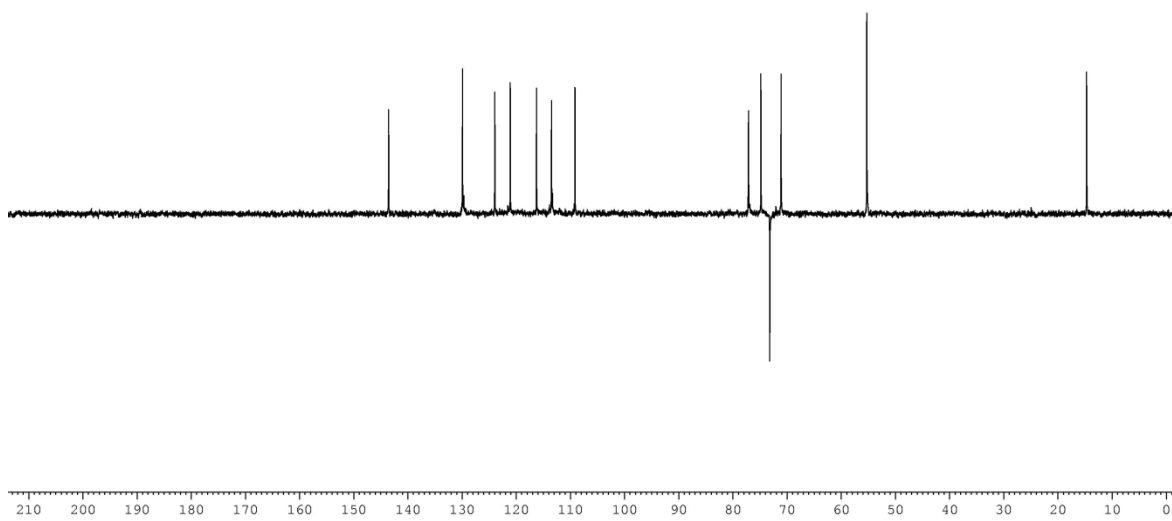

$^1\text{H}$ ,  $^{13}\text{C}$  and DEPT 135 NMR spectra of compound 20.

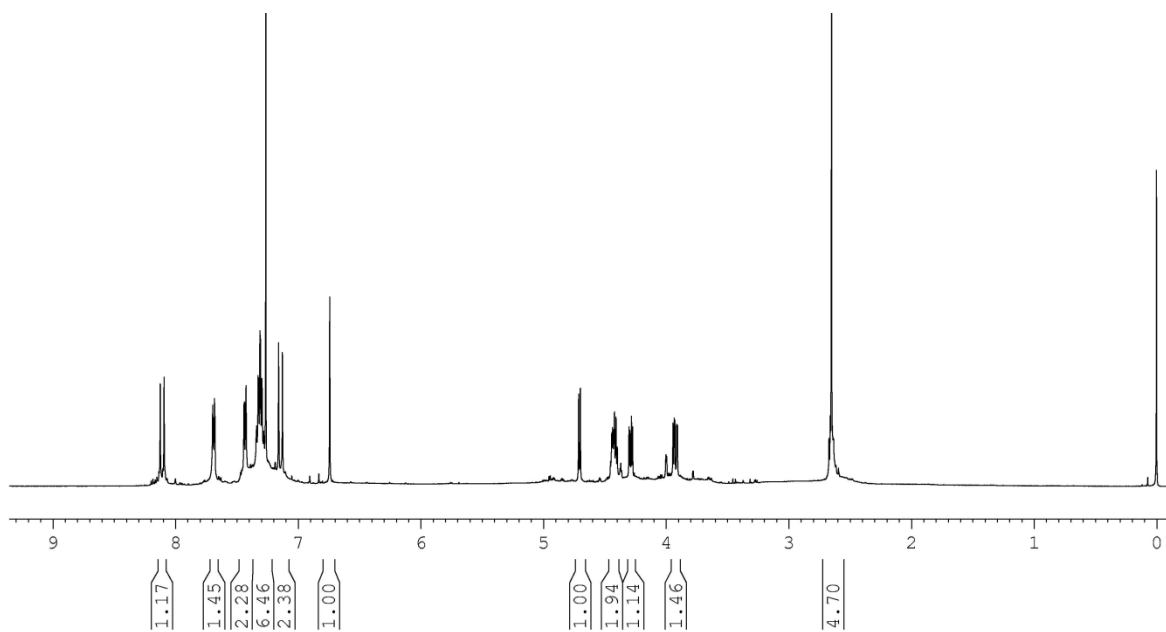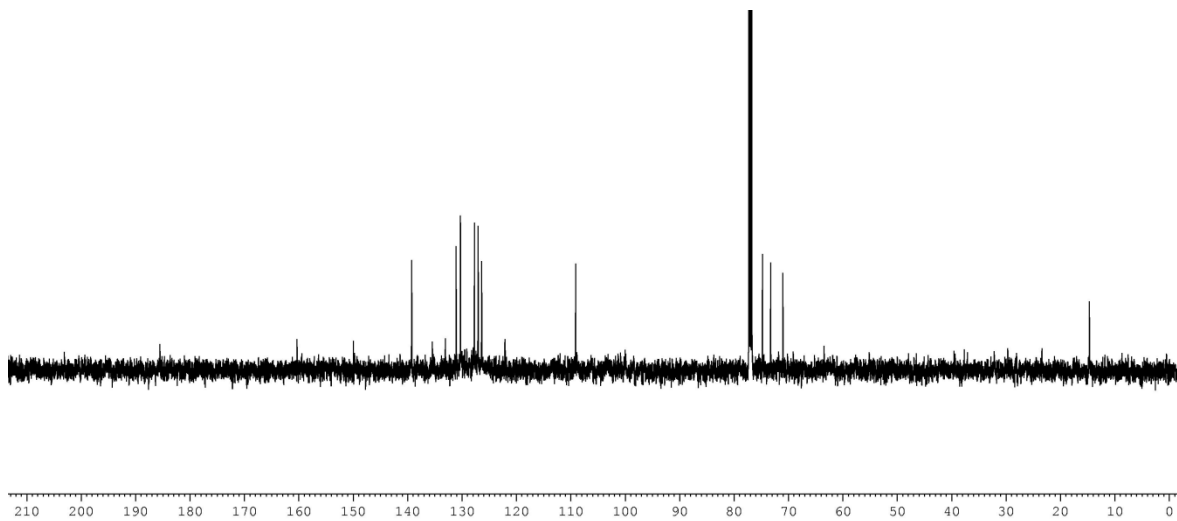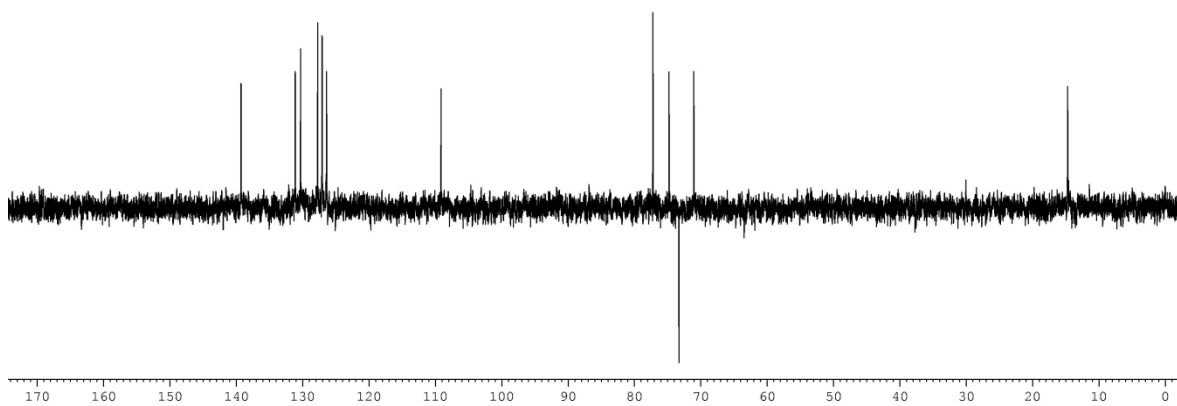

$^1\text{H}$ ,  $^{13}\text{C}$  and DEPT 135 NMR spectra of compound **21**.



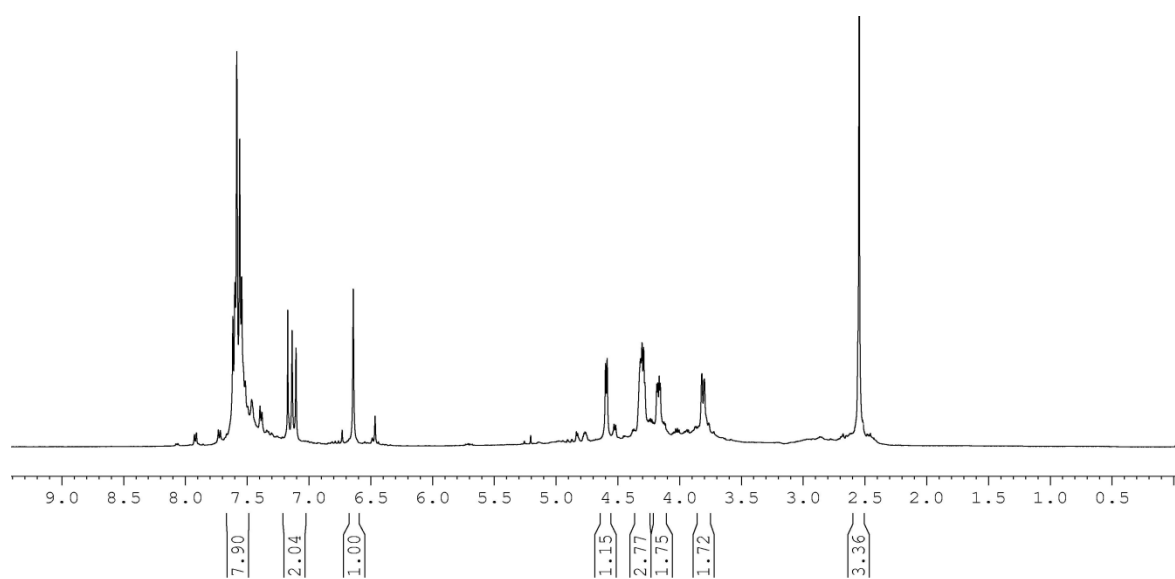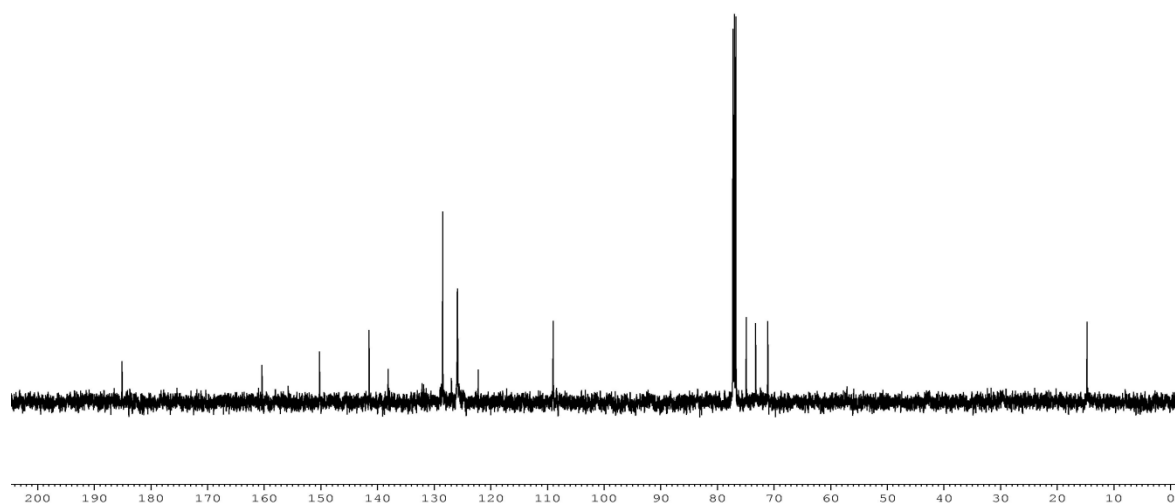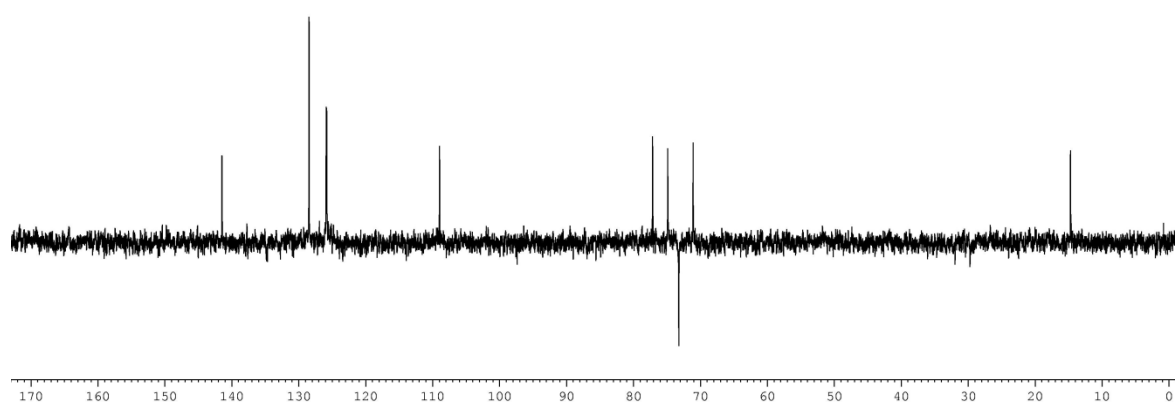

$^1\text{H}$ ,  $^{13}\text{C}$  and DEPT 135 NMR spectra of compound **22**.

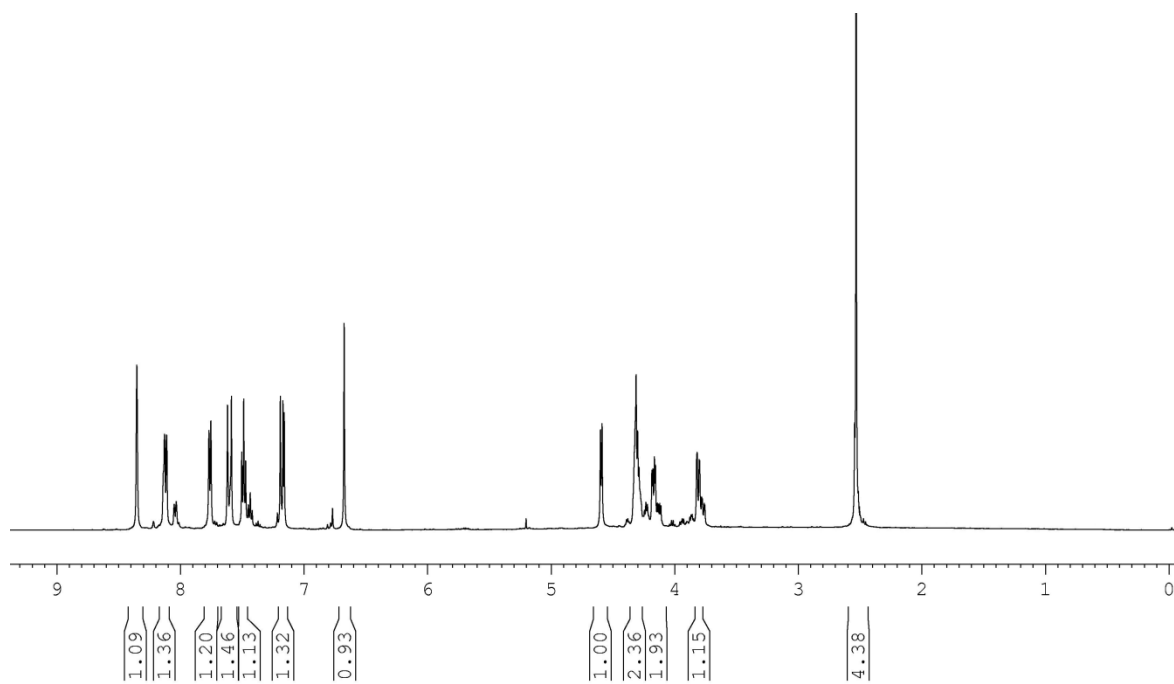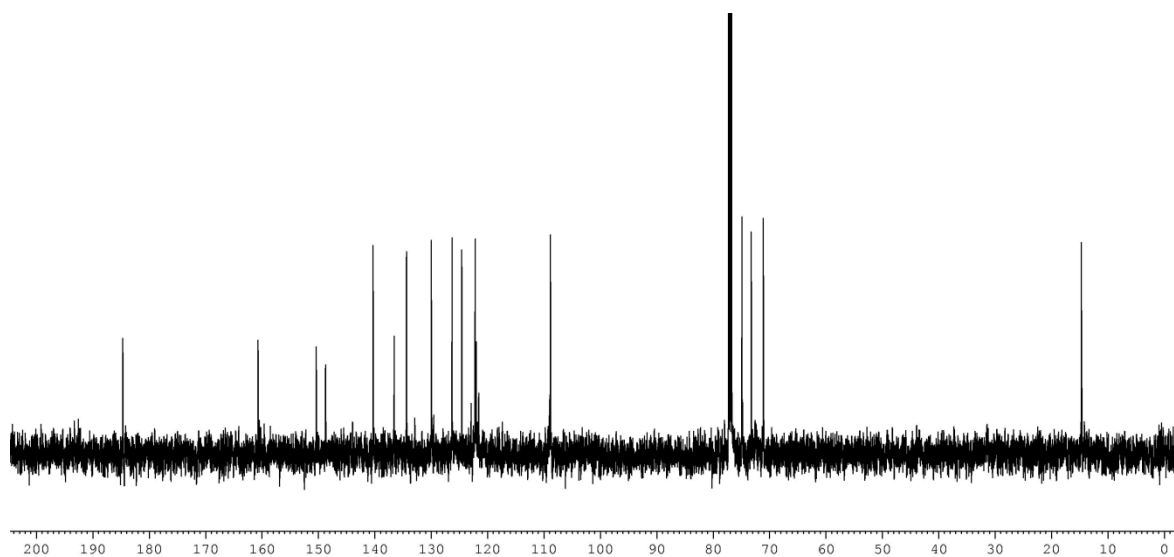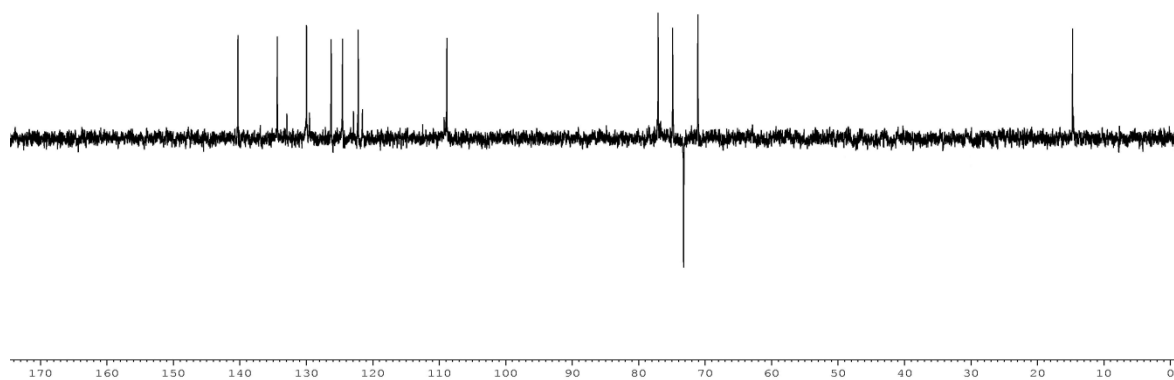

$^1\text{H}$ ,  $^{13}\text{C}$  and DEPT 135 NMR spectra of compound **23**.

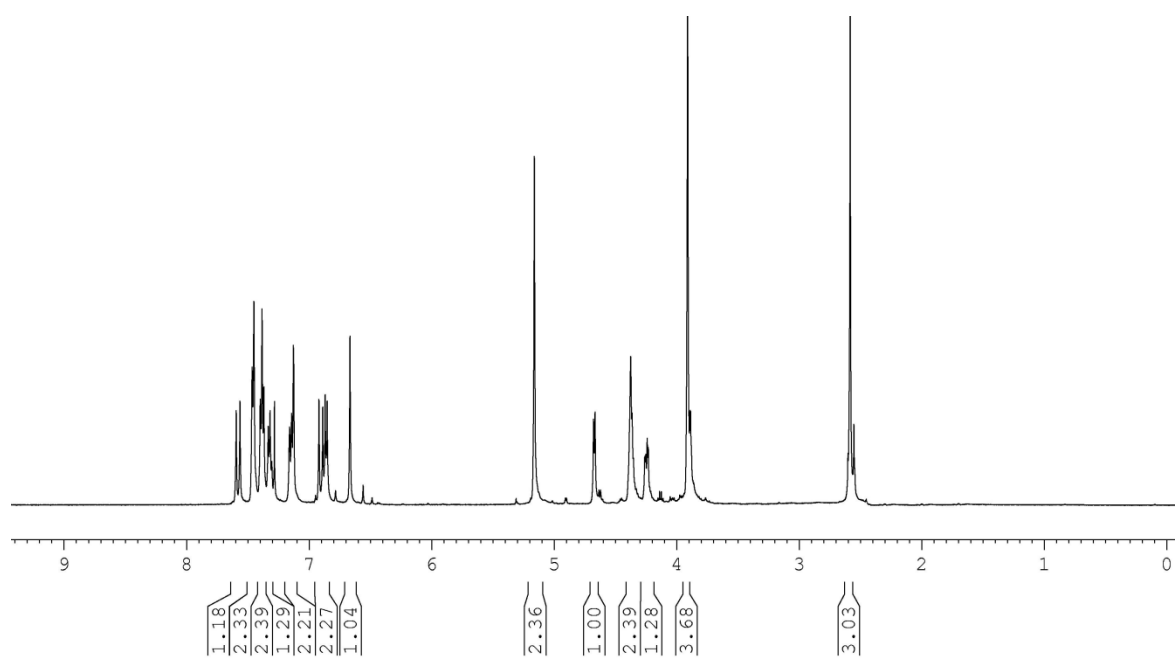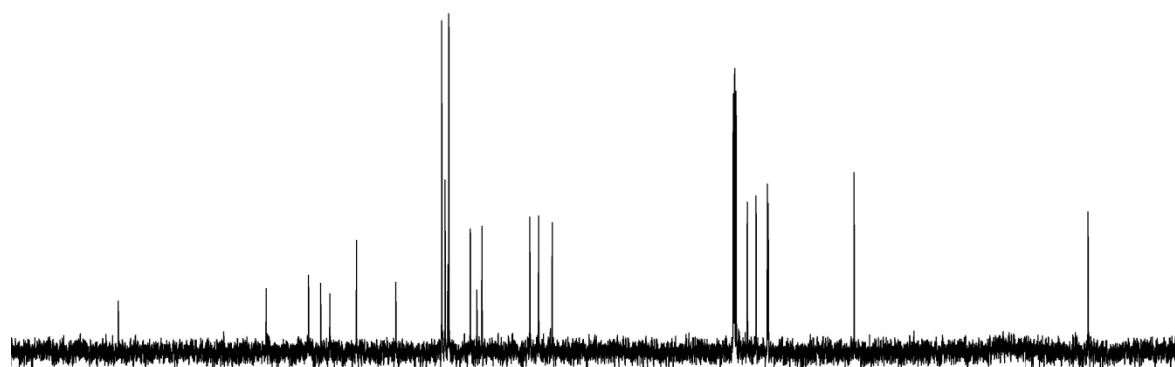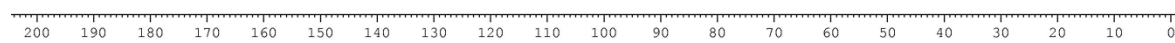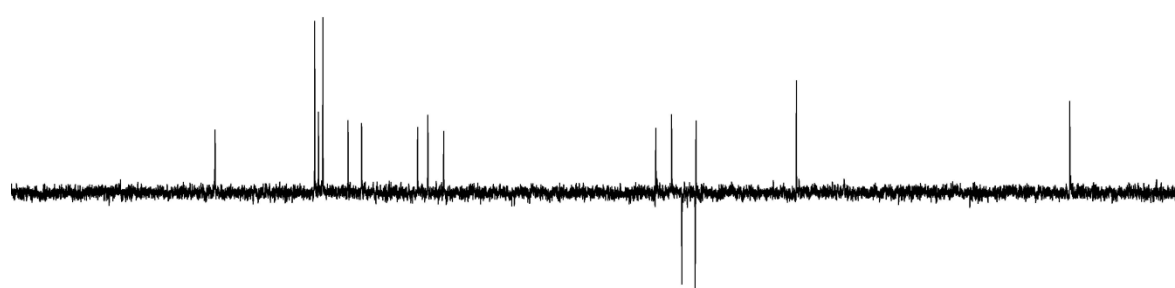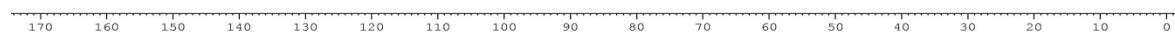

$^1\text{H}$ ,  $^{13}\text{C}$  and DEPT 135 NMR spectra of compound 24.

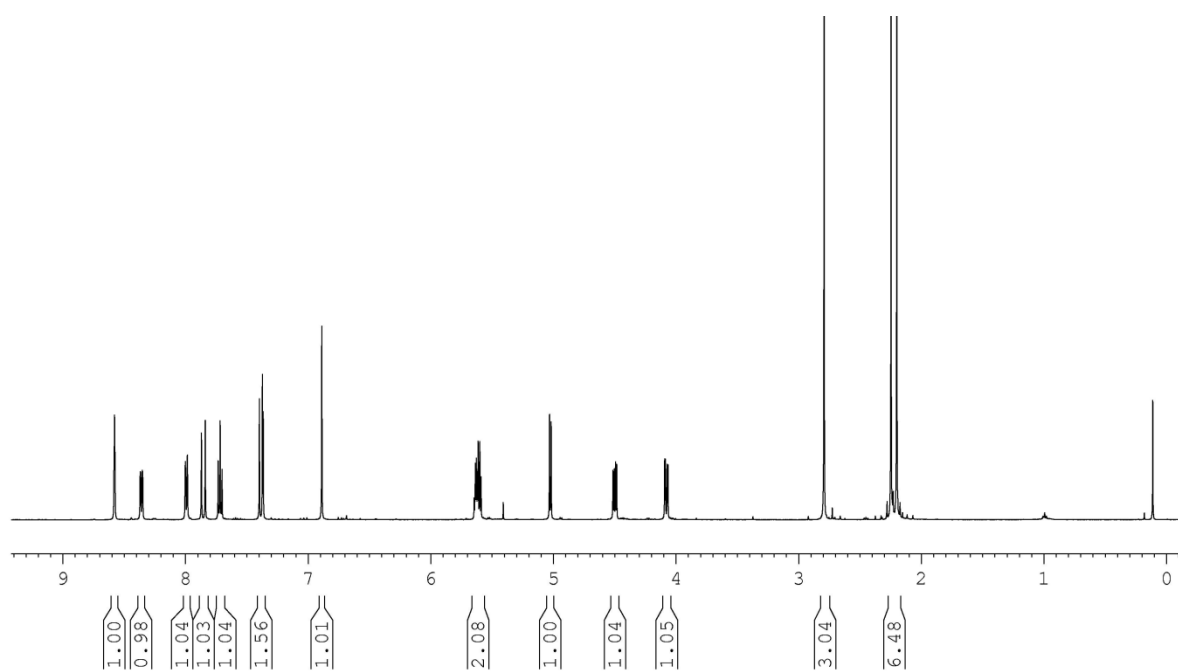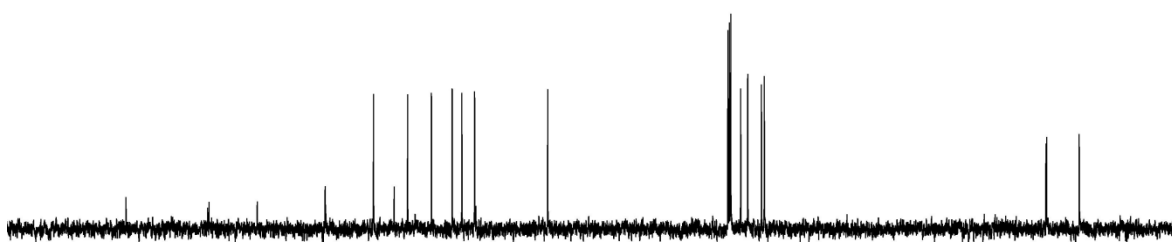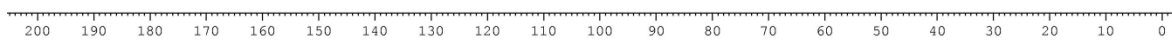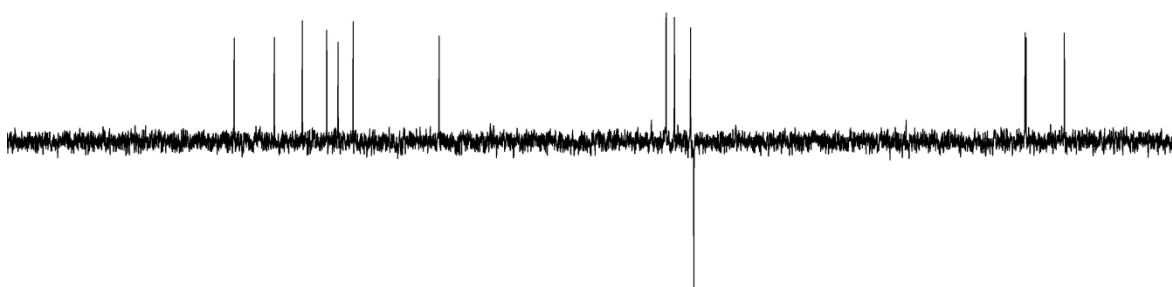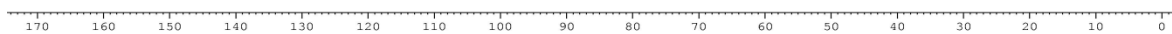

$^1\text{H}$ ,  $^{13}\text{C}$  and DEPT 135 NMR spectra of compound **25**.

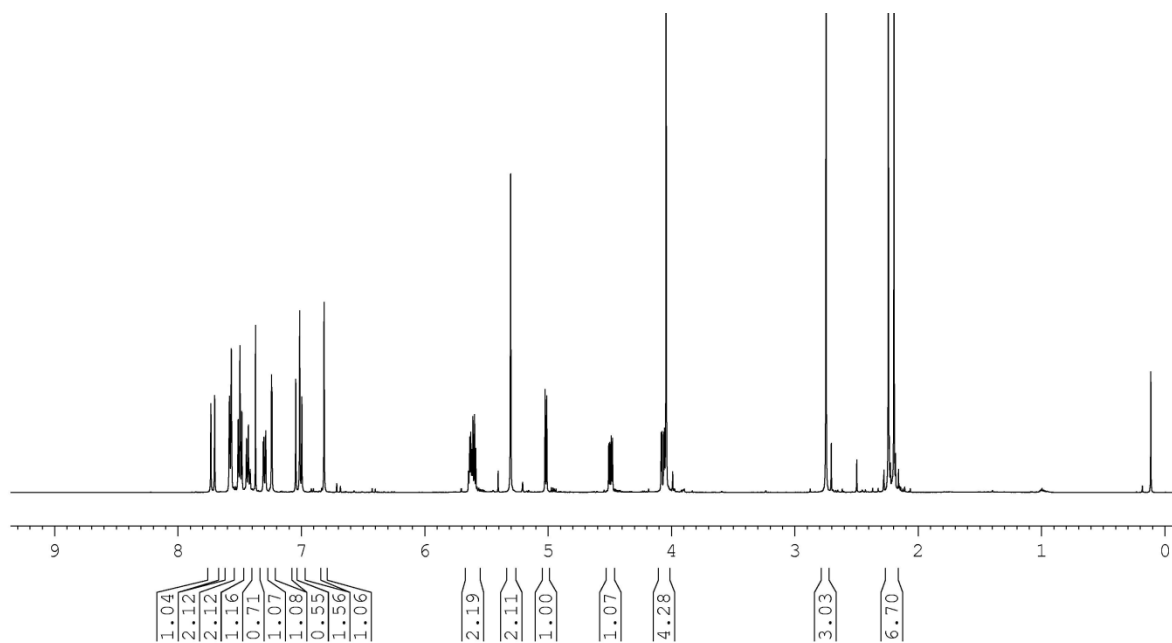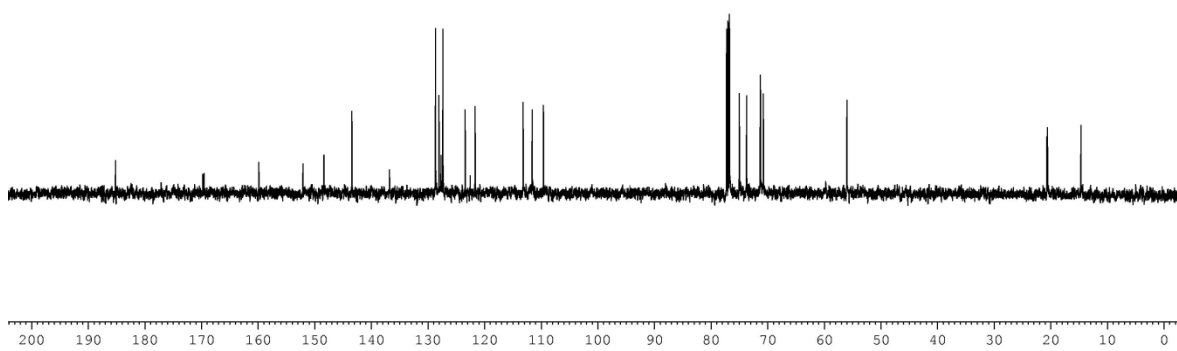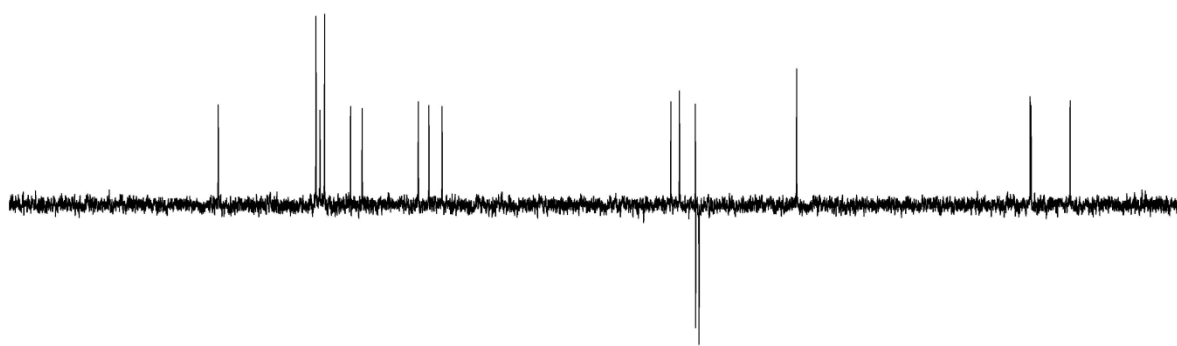

$^1\text{H}$ ,  $^{13}\text{C}$  and DEPT 135 NMR spectra of compound **26**.

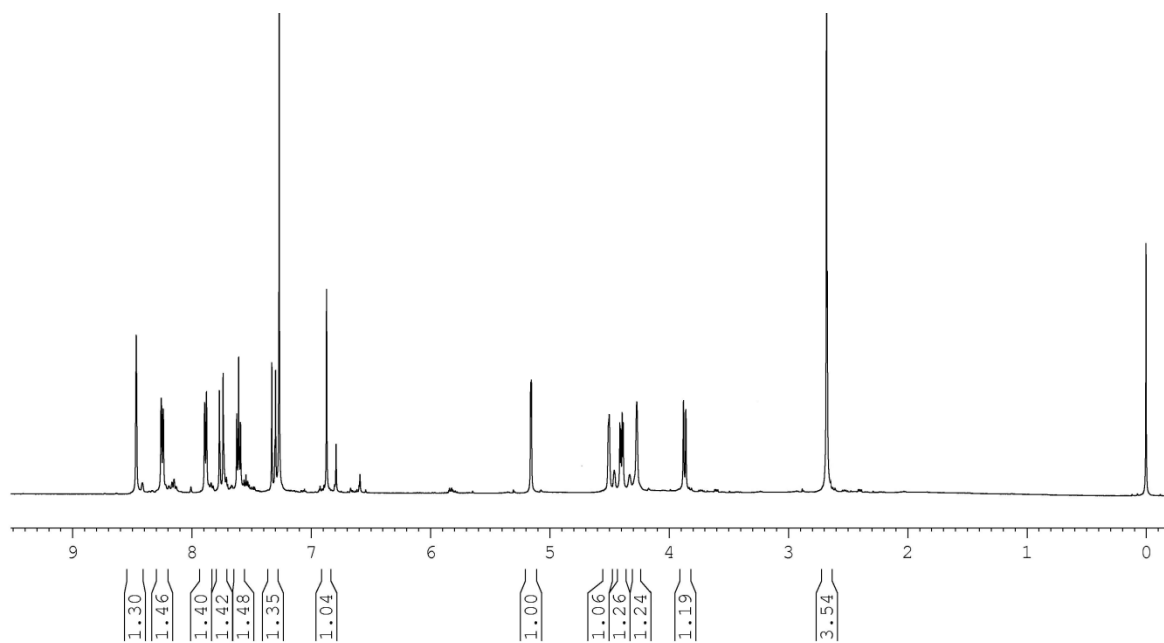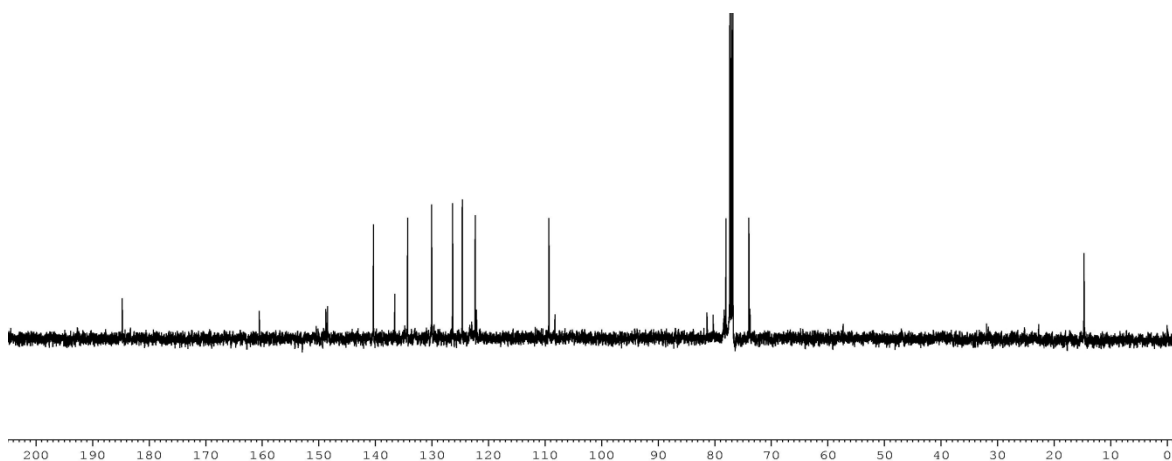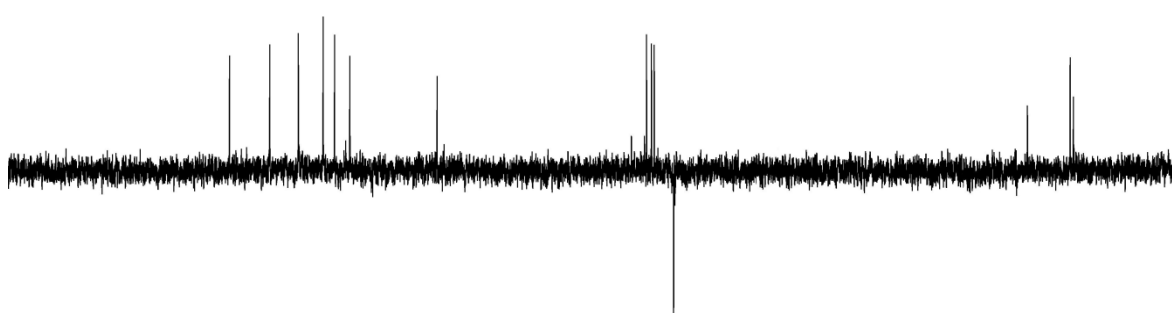

$^1\text{H}$ ,  $^{13}\text{C}$  and DEPT 135 NMR spectra of compound 27.

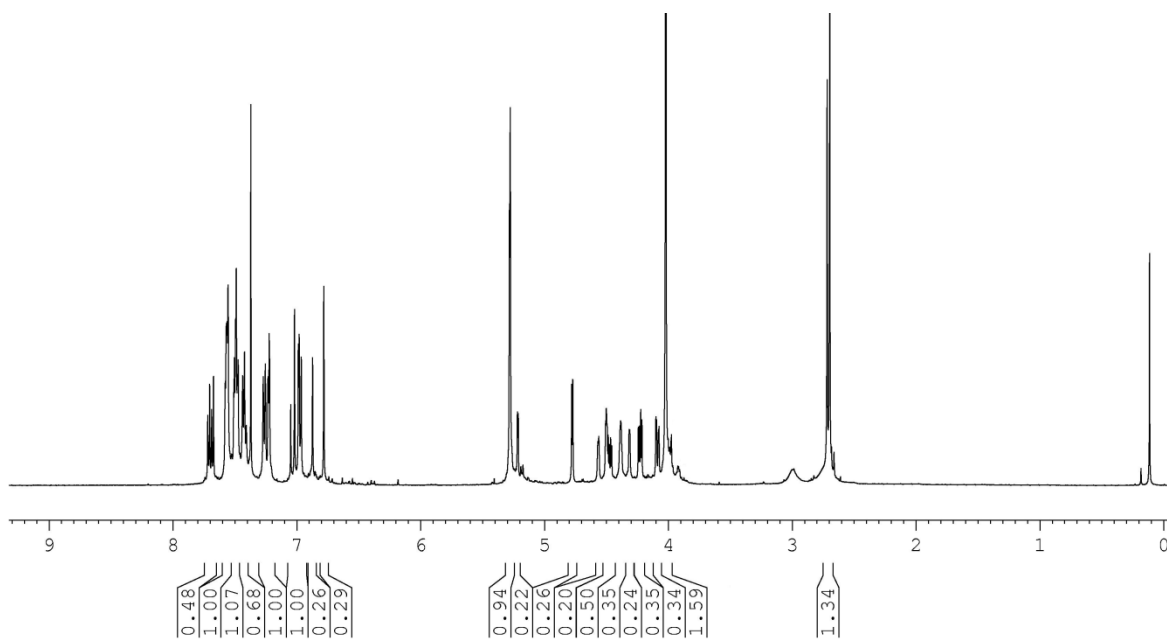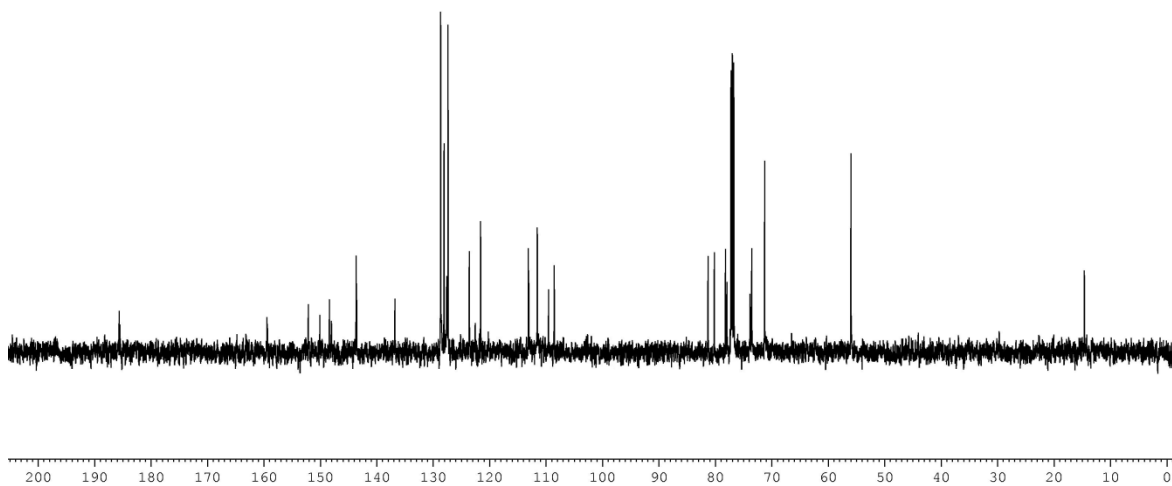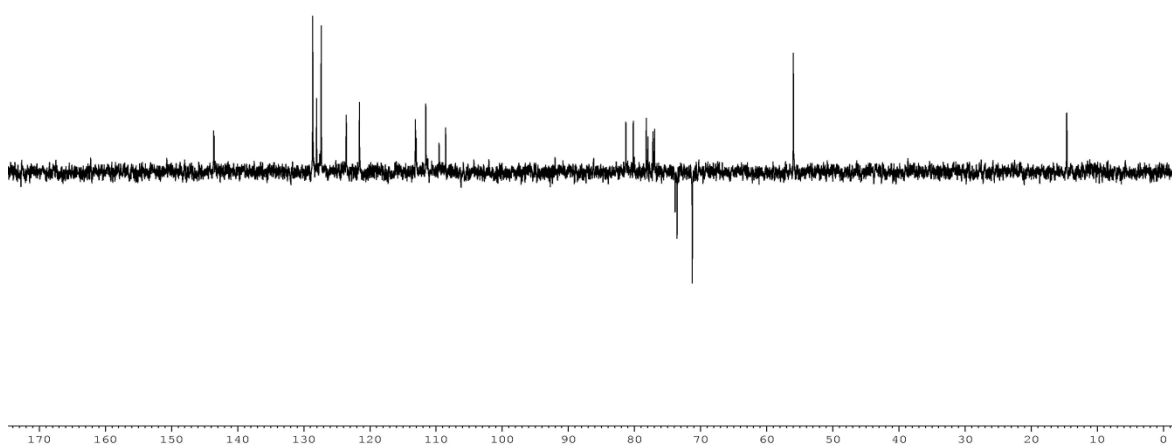

$^1\text{H}$ ,  $^{13}\text{C}$  and DEPT 135 NMR spectra of compound **28**.

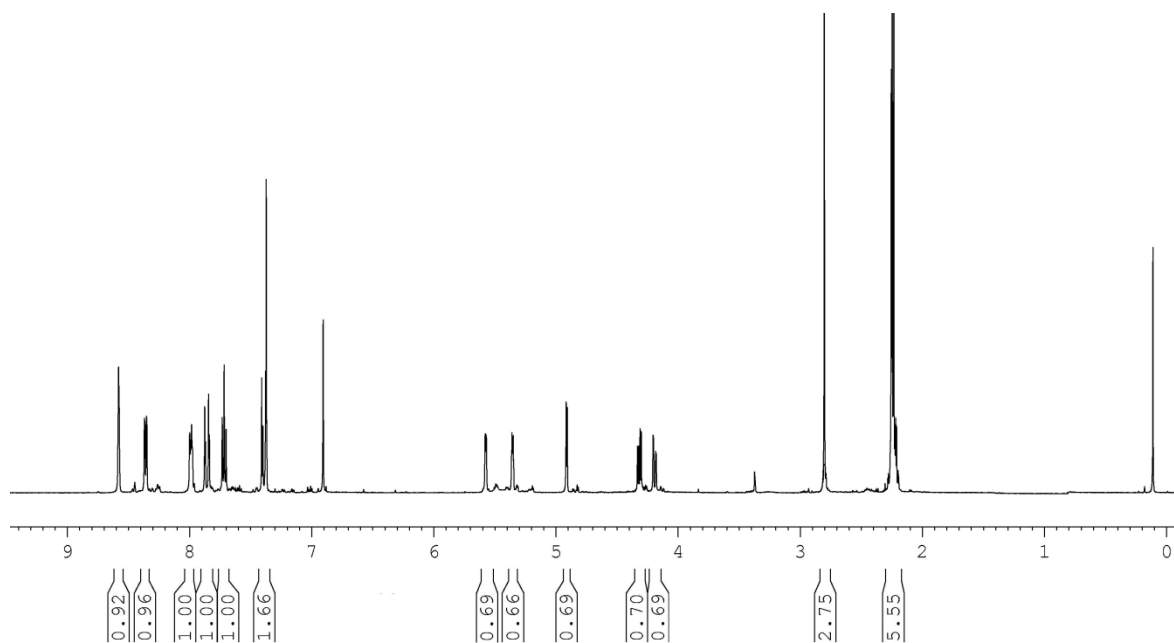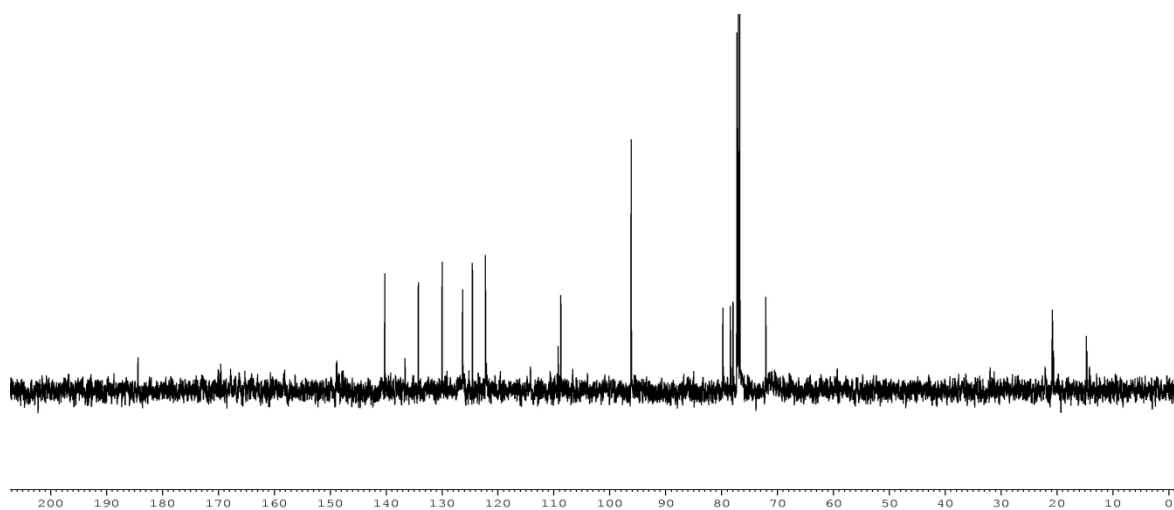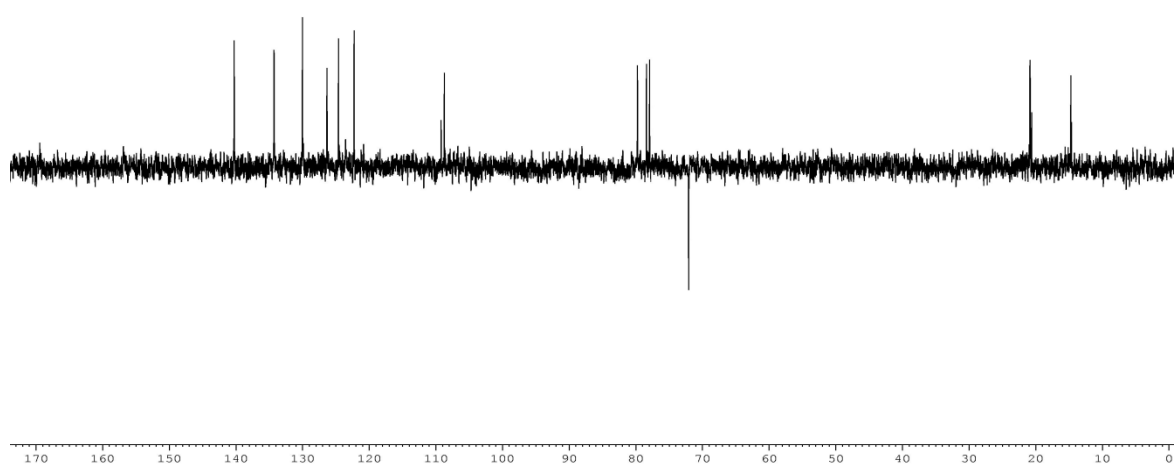

$^1\text{H}$ ,  $^{13}\text{C}$  and DEPT 135 NMR spectra of compound **29**.



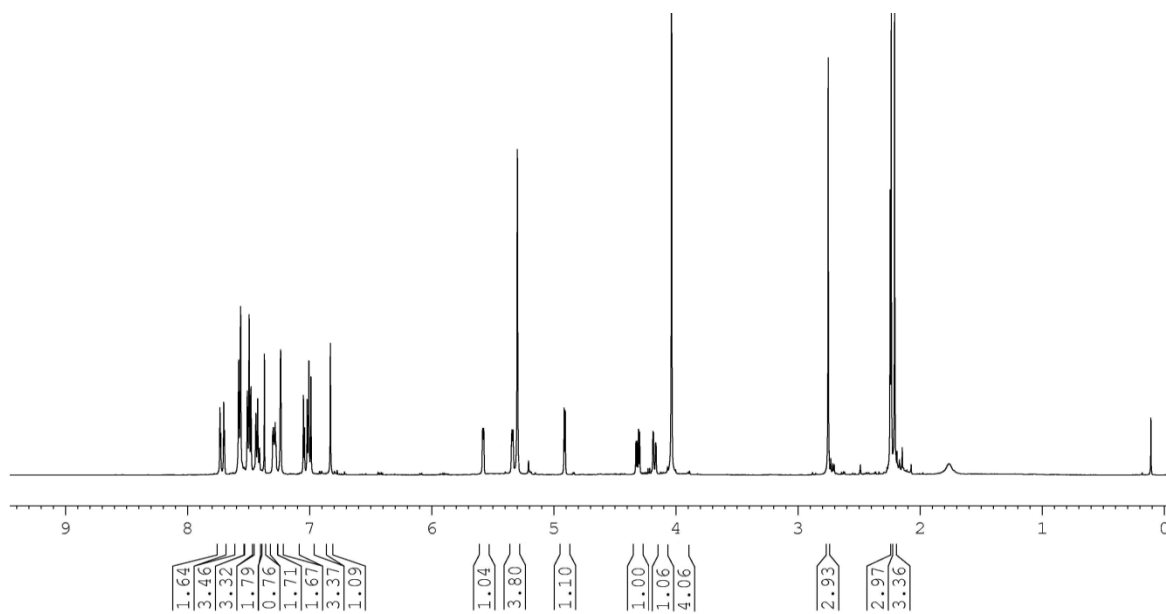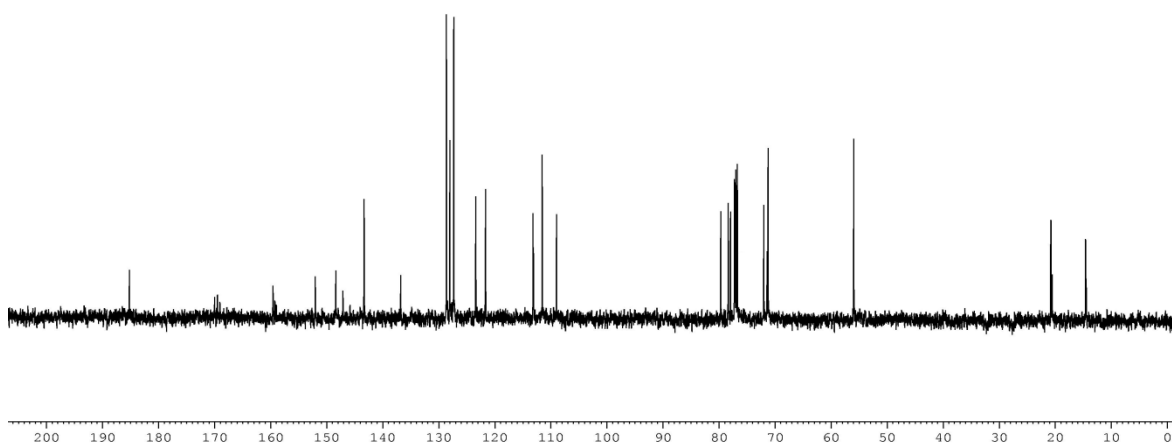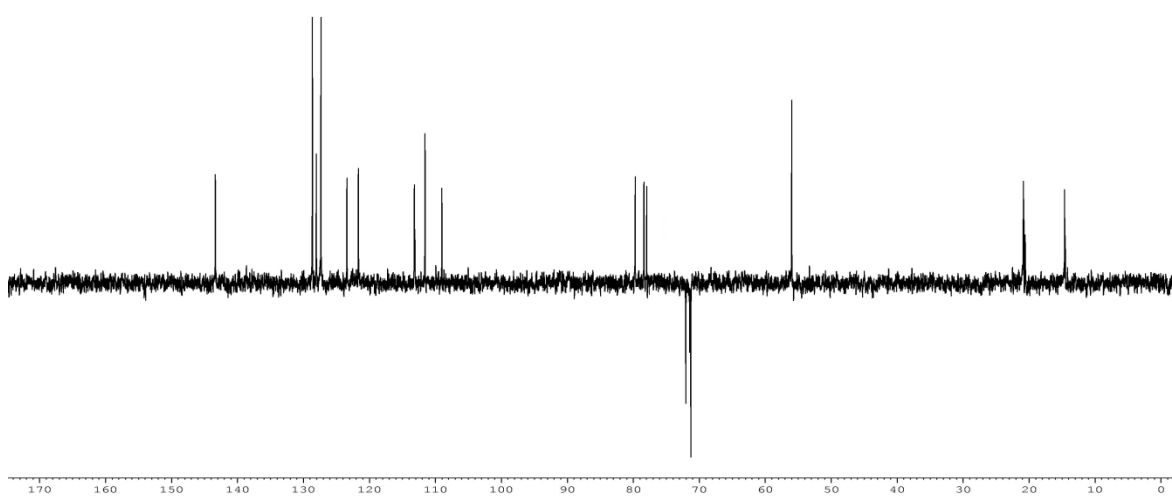

$^1\text{H}$ ,  $^{13}\text{C}$  and DEPT 135 NMR spectra of compound **30**.

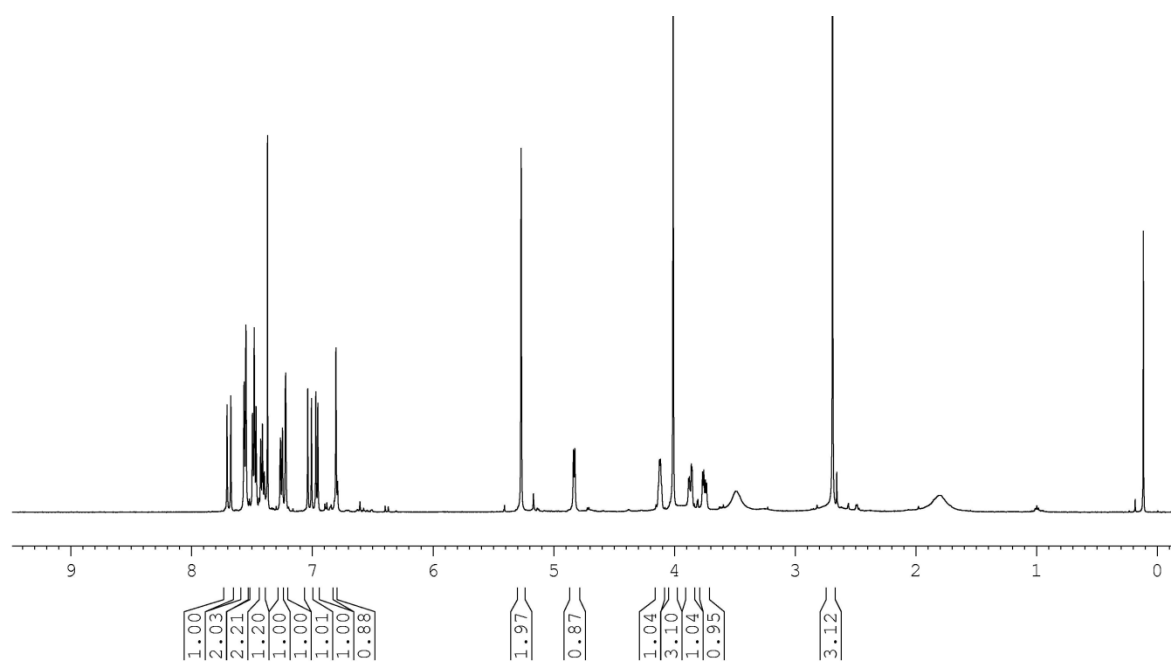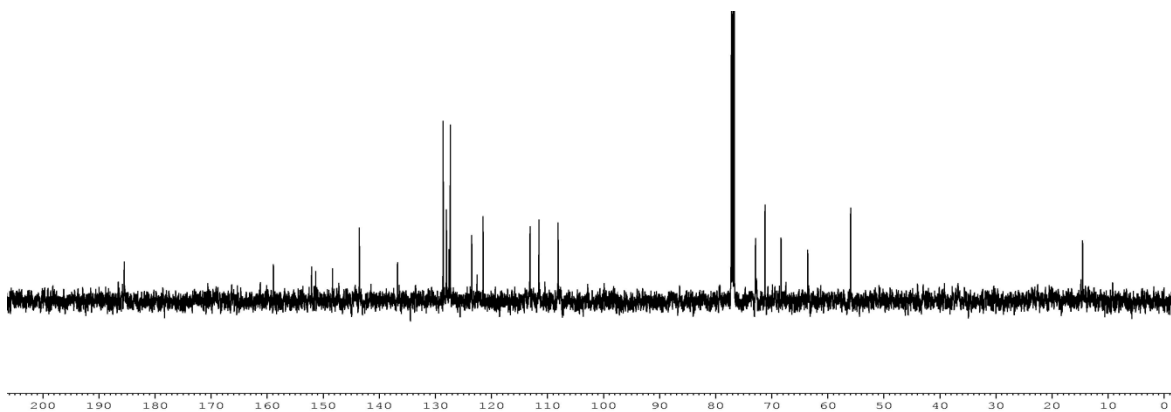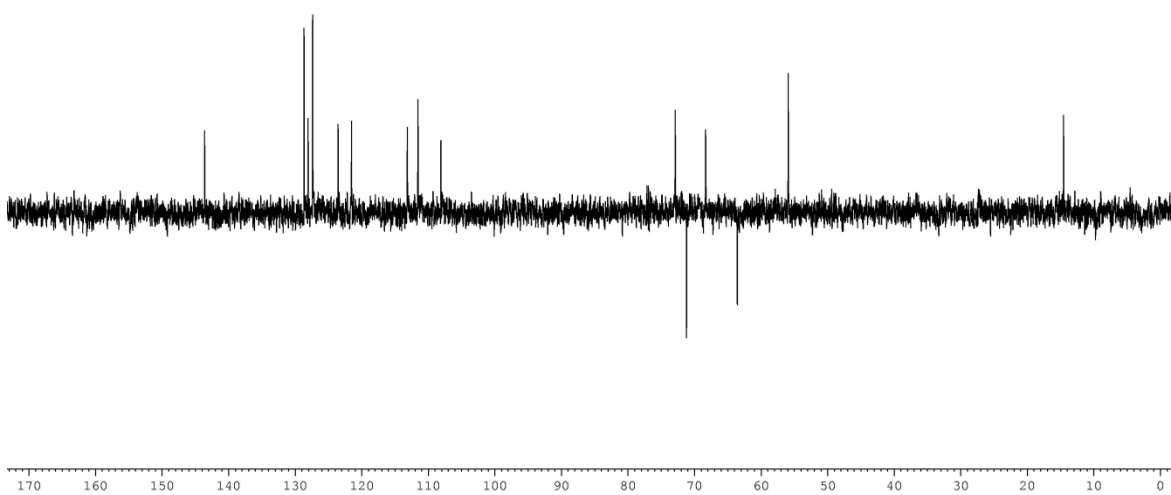

$^1\text{H}$ ,  $^{13}\text{C}$  and DEPT 135 NMR spectra of compound **31**.

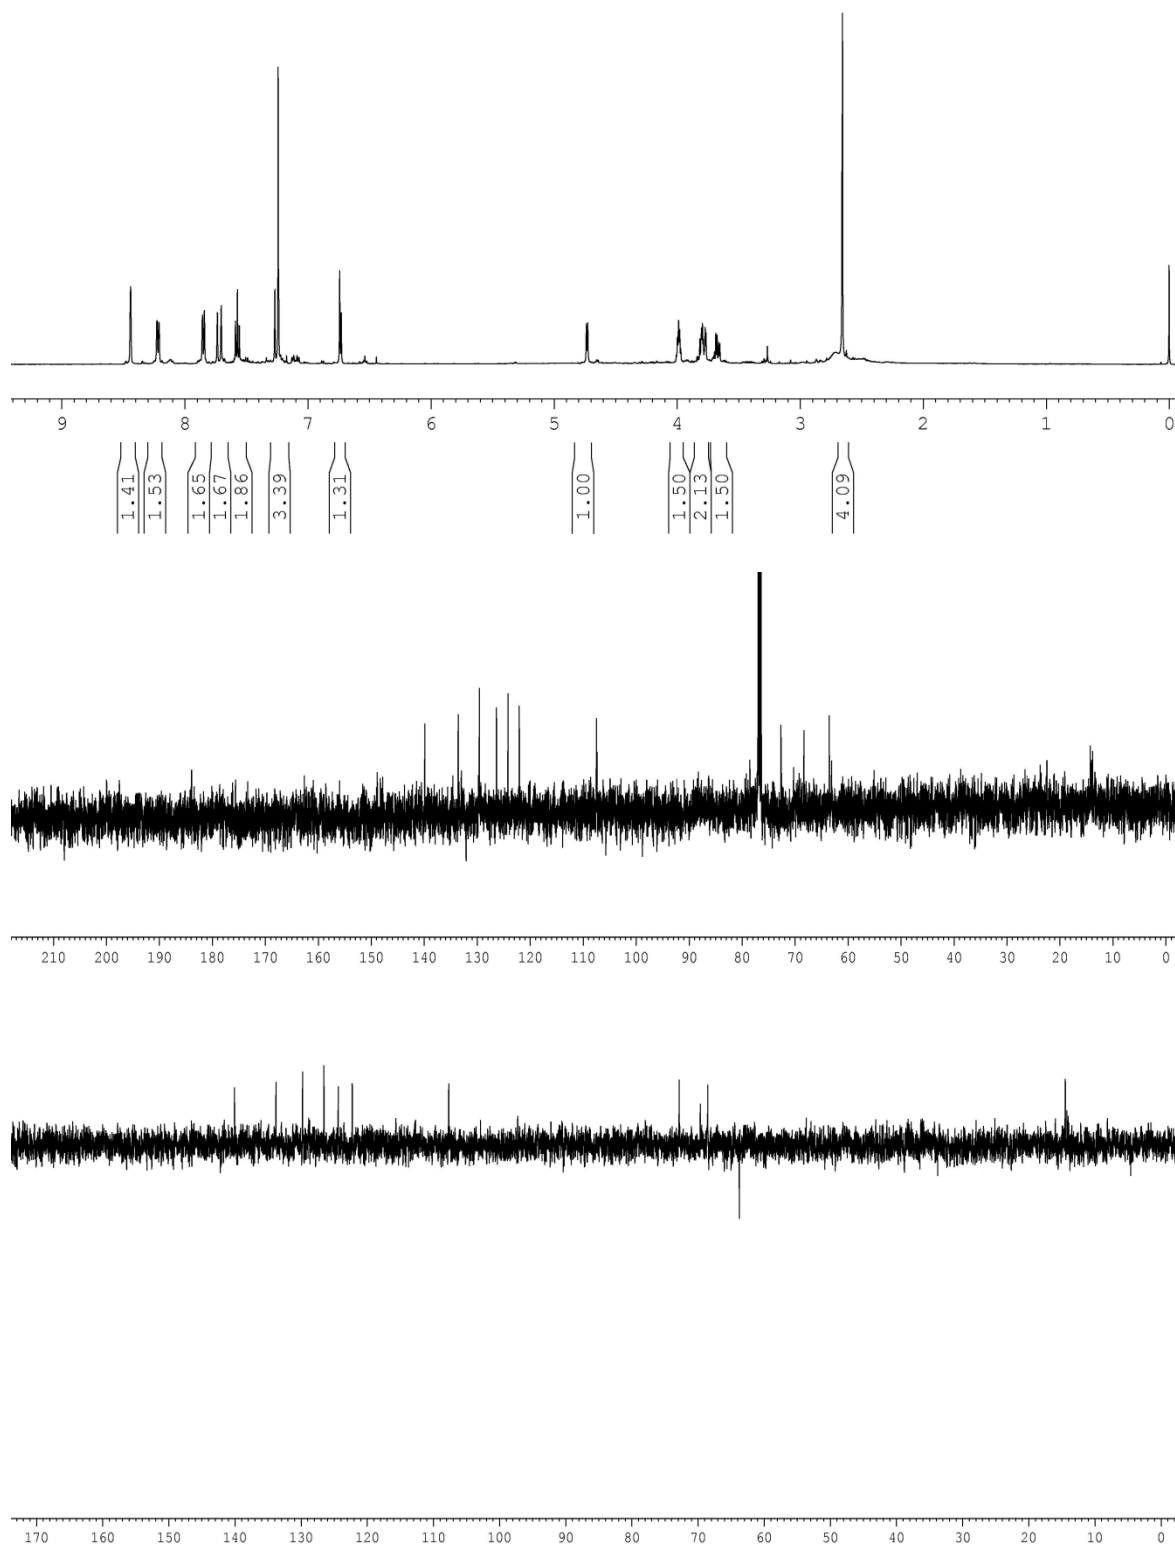

$^1\text{H}$ ,  $^{13}\text{C}$  and DEPT 135 NMR spectra of compound **32**.

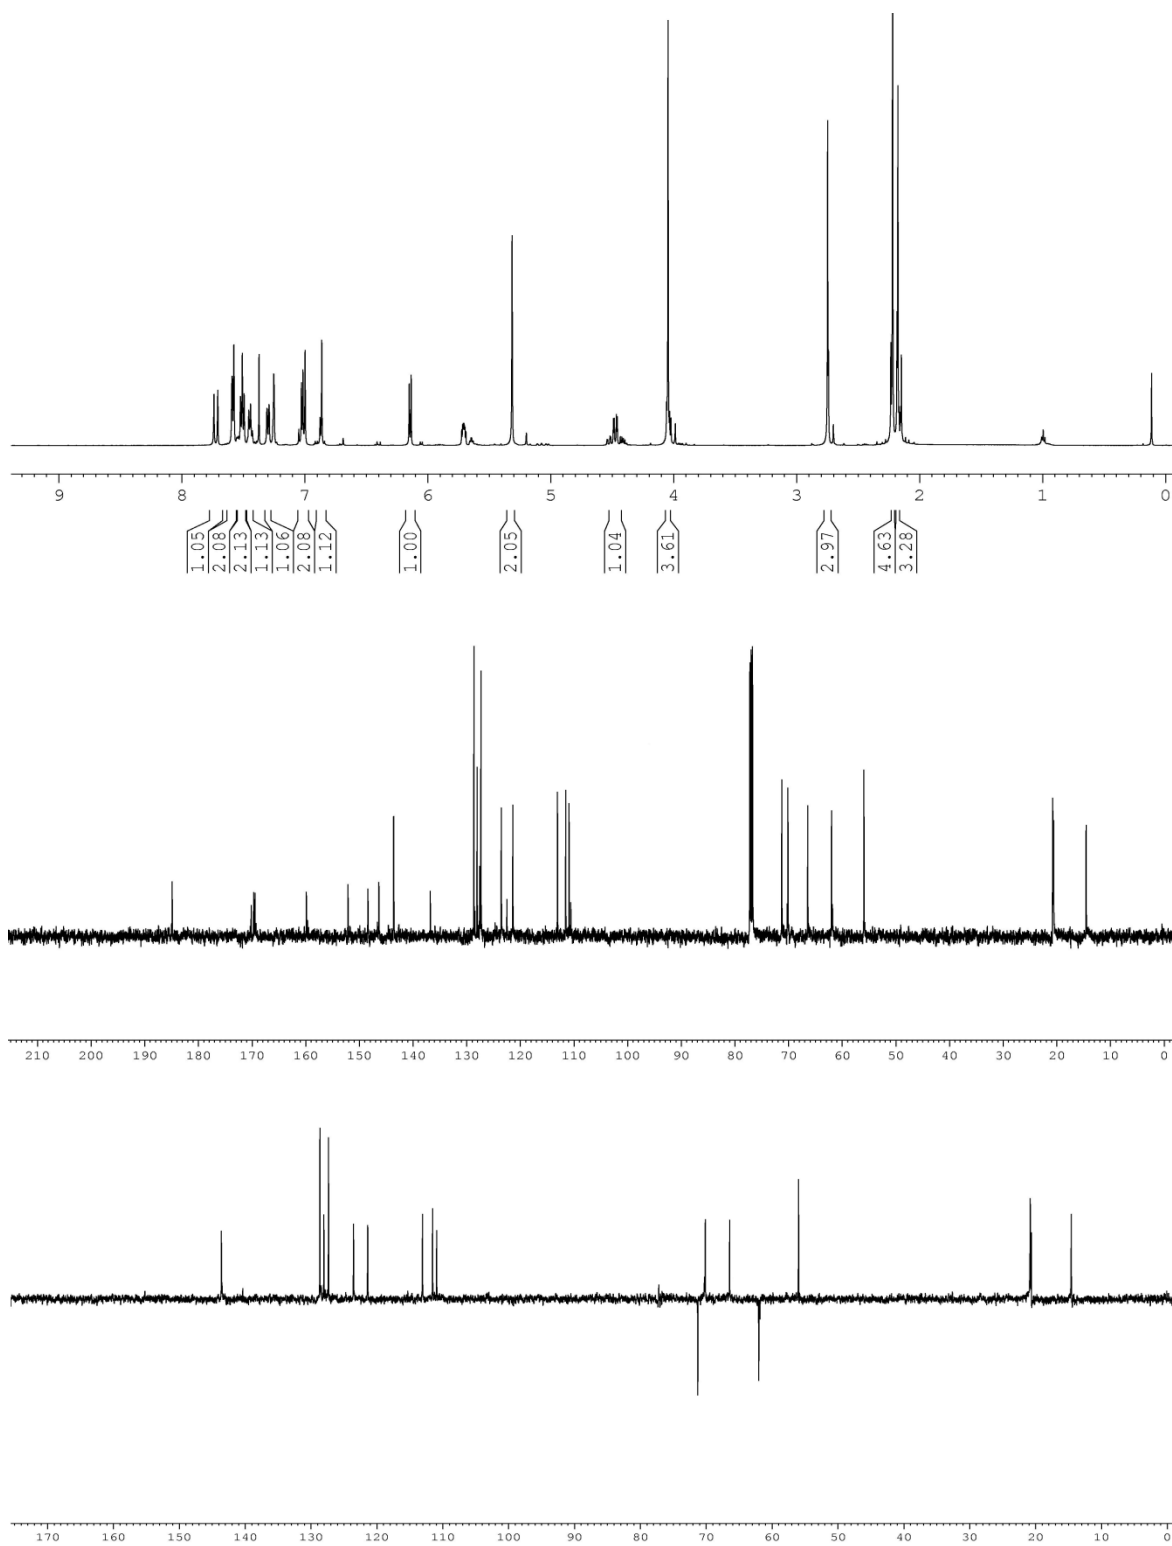

$^1\text{H}$ ,  $^{13}\text{C}$  and DEPT 135 NMR spectra of compound 33.

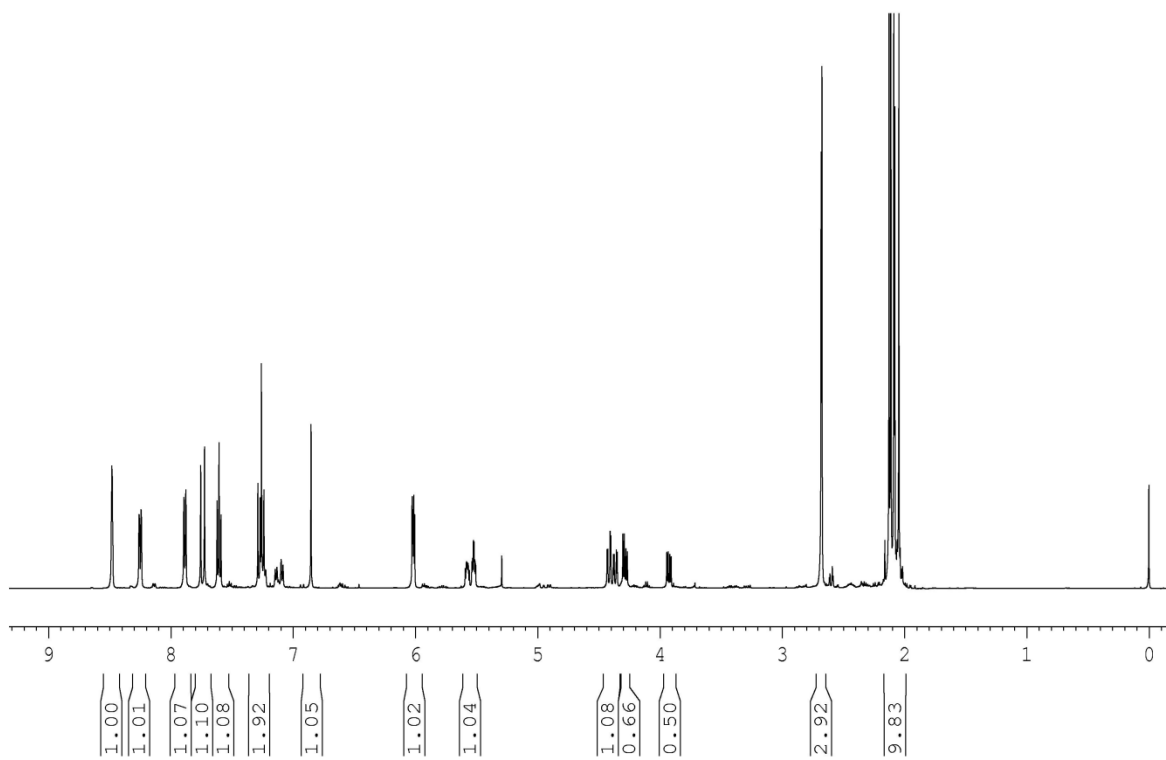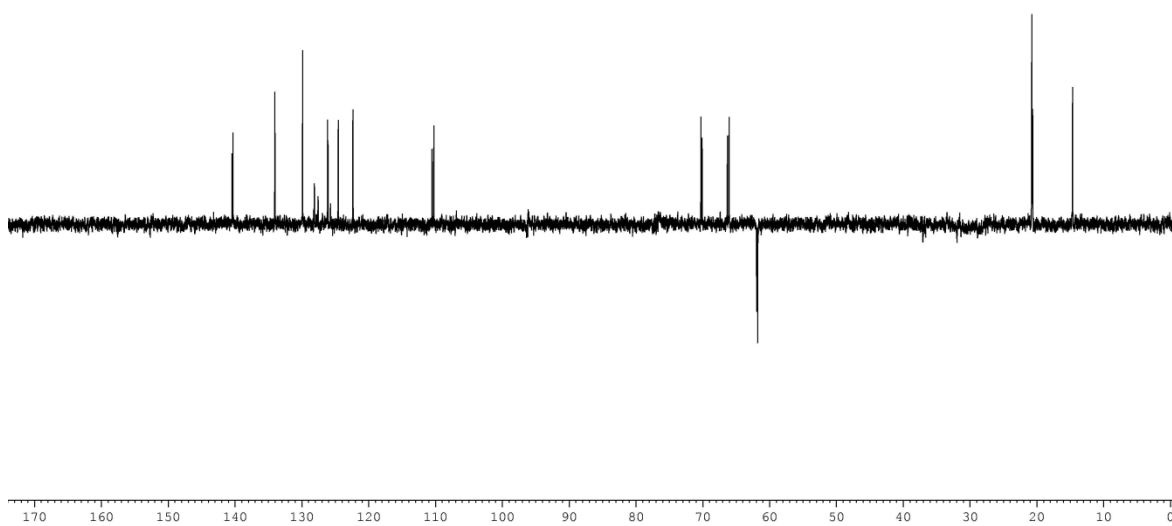

$^1\text{H}$  and  $^{13}\text{C}$  DEPT 135 NMR spectra of compound **34**.
